1 **Single-cell RNA-seq of dopaminergic neurons informs candidate gene selection for sporadic**

2 **Parkinson's disease**

3

4 Paul W. Hook<sup>1</sup>, Sarah A. McClymont<sup>1</sup>, Gabrielle H. Cannon<sup>1</sup>, William D. Law<sup>1</sup>, A. Jennifer

5 Morton<sup>2</sup>, Loyal A. Goff<sup>1,3\*</sup>, Andrew S. McCallion<sup>1,4,5\*</sup>

6

7 <sup>1</sup>McKusick-Nathans Institute of Genetic Medicine, Johns Hopkins University School of

8 Medicine, Baltimore, Maryland, United States of America

9 <sup>2</sup>Department of Physiology Development and Neuroscience, University of Cambridge,

10 Cambridge, United Kingdom

11 <sup>3</sup>Department of Neuroscience, Johns Hopkins University School of Medicine, Baltimore,

12 Maryland, United States of America

13 <sup>4</sup>Department of Comparative and Molecular Pathobiology, Johns Hopkins University School of

14 Medicine, Baltimore, Maryland, United States of America

15 <sup>5</sup>Department of Medicine, Johns Hopkins University School of Medicine, Baltimore, Maryland,

16 United States of America

17 \*, To whom correspondence should be addressed: [andy@jhmi.edu](mailto:andy@jhmi.edu) and [loyalgoff@jhmi.edu](mailto:loyalgoff@jhmi.edu)

18 **ABSTRACT**

19 Parkinson's disease (PD) is caused by the collapse of *substantia nigra* (SN) dopaminergic (DA)  
20 neurons of the midbrain (MB), while other DA populations remain relatively intact. Common  
21 variation influencing susceptibility to sporadic PD has been primarily identified through genome  
22 wide association studies (GWAS). However, like many other common genetic diseases, the  
23 genes impacted by common PD-associated variation remain to be elucidated. Here, we used  
24 single-cell RNA-seq to characterize DA neuron populations in the mouse brain at embryonic and  
25 early postnatal timepoints. These data allow for the unbiased identification of DA neuron  
26 subpopulations, including a novel postnatal neuroblast population and SN DA neurons.  
27 Comparison of SN DA neurons with other DA neurons populations in the brain reveals a unique  
28 transcriptional profile, novel marker genes, and specific gene regulatory networks. By integrating  
29 these cell population specific data with published GWAS, we develop a scoring system for  
30 prioritizing candidate genes in PD-associated loci. With this, we prioritize candidate genes in all  
31 32 GWAS intervals implicated in sporadic PD risk, the first such systematically generated list.  
32 From this we confirm that the prioritized candidate gene *CPLXI* disrupts the nigrostriatal  
33 pathway when knocked out in mice. Ultimately, this systematic rationale leads to the  
34 identification of biologically pertinent candidates and testable hypotheses for sporadic PD that  
35 will inform a new era of PD genetic research.

36 The most commonly used genetic tool today for studying complex disease is the genome wide  
37 association study (GWAS). As a strategy, GWAS was initially hailed for the insight it might  
38 provide into the genetic architecture of common human disease risk. Indeed, the collective data  
39 from GWAS since 2005 has revealed a trove of variants and genomic intervals associated with  
40 an array of phenotypes<sup>1</sup>. The majority of variants identified in GWAS are located in non-coding  
41 DNA<sup>2</sup> and are enriched for characteristics denoting regulatory DNA<sup>2,3</sup>. This regulatory variation  
42 is expected to impact expression of a nearby gene, leading to disease susceptibility.

43  
44 Traditionally, the gene closest to the lead SNP has been prioritized as the affected gene.  
45 However, recent studies show that disease-associated variants can act on more distally located  
46 genes, invalidating genes that were previously extensively studied<sup>4,5</sup>. The inability to  
47 systematically connect common variation with the genes impacted limits our capacity to  
48 elucidate potential therapeutic targets and can waste valuable research efforts.

49  
50 Although GWAS is inherently agnostic to the context in which disease-risk variation acts, the  
51 biological impact of common functional variation has been shown to be cell context  
52 dependent<sup>2,6</sup>. Extending these observations, Pritchard and colleagues recently demonstrated that  
53 although genes need only to be expressed in disease-relevant cell types to contribute to risk,  
54 those expressed preferentially or exclusively therein contribute more per SNP<sup>7</sup>. Thus, accounting  
55 for the cellular and gene regulatory network (GRN) contexts within which variation act may  
56 better inform the identification of impacted genes. These principles have not yet been applied  
57 systematically to many of the traits for which GWAS data exists. We have chosen Parkinson's

58 disease (PD) as a model complex disorder for which a significant body of GWAS data remains to  
59 be explored biologically in a context dependent manner.

60

61 PD is the most common progressive neurodegenerative movement disorder. Incidence of PD  
62 increases with age, affecting an estimated 1% worldwide beyond 70 years of age<sup>8-10</sup>. The genetic  
63 underpinnings of non-familial or sporadic PD have been studied through the use of GWAS with  
64 a recent meta-analysis highlighting 32 loci associated with sporadic PD susceptibility<sup>11</sup>. While a  
65 small fraction of PD GWAS loci contain genes known to be mutated in familial PD (*SNCA* and  
66 *LRRK2*)<sup>12,13</sup>, most indicted intervals do not contain a known causal gene or genes. Although PD  
67 ultimately affects multiple neuronal centers, preferential degeneration of DA neurons in the SN  
68 leads to functional collapse of the nigrostriatal pathway and loss of fine motor control. The  
69 preferential degeneration of SN DA neurons in relation to other mesencephalic DA neurons has  
70 driven research interest in the genetic basis of selective SN vulnerability in PD. Consequently,  
71 one can reasonably assert that a significant fraction of PD-associated variation likely mediates its  
72 influence specifically within the SN.

73

74 In an effort to illuminate a biological context in which PD GWAS results could be better  
75 interpreted, we undertook single-cell RNA-seq (scRNA-seq) analyses of multiple DA neuronal  
76 populations in the brain, including ventral midbrain DA neurons. This analysis defined the  
77 heterogeneity of DA populations over developmental time in the brain, revealing gene  
78 expression profiles specific to discrete DA neuron subtypes. These data further facilitated the  
79 definition of GRNs active in DA neuron populations including the SN. With these data, we

80 establish a framework to systematically prioritize candidate genes in all 32 PD GWAS loci and  
81 begin exploring their pathological significance.

82

## 83 **RESULTS**

### 84 *scRNA-seq characterization defines DA neuronal subpopulation heterogeneity*

85 In order to characterize DA neuron molecular phenotypes, we undertook scRNA-seq on cells  
86 isolated from distinct anatomical locations of the mouse brain over developmental time. We used  
87 fluorescence activated cell sorting (FACS) to retrieve single DA neurons from the Tg(Th-  
88 EGFP)DJ76Gsat BAC transgenic mouse line, which expresses eGFP under the control of the  
89 tyrosine hydroxylase (*Th*) locus<sup>14</sup>. We microdissected both MB and FB from E15.5 mice,  
90 extending our analyses to MB, FB, and OB in P7 mice (Figure 1a). E15.5 and P7 time points  
91 were chosen based on their representation of stable MB DA populations, either after neuron birth  
92 (E15.5) or between periods of programmed cell death (P7) (Figure 1a)<sup>15</sup>.

93

94 Quality control and outlier analysis identify 396 high quality cell transcriptomes to be used in  
95 our analyses. We initially sequenced RNA from 473 single cells to an average depth of  $\sim 8 \times 10^5$   
96 50 bp paired-end fragments per cell. Using Monocle 2, we converted normalized expression  
97 estimates into estimates of RNA copies per cell<sup>16</sup>. Cells were filtered based on the distributions  
98 of total mass, total number of mRNAs, and total number of expressed genes per cell  
99 (Supplementary Figure 1a, 1b, 1c; detailed in Methods). After QC, 410 out of 473 cells were  
100 retained. Using principal component analysis (PCA) as part of the iterative analysis described  
101 below, we identified and removed 14 outliers determined to be astrocytes, microglia, or

102 oligodendrocytes (Supplementary Figure 1e; Supplementary Table 1), leaving 396 cells (~79  
103 cells/timepoint-region; Supplementary Figure 1d).

104

105 To confirm that our methods can discriminate between different populations of neurons, we first  
106 explored differences between timepoints. Following a workflow similar to the recently described  
107 “dpFeature” procedure<sup>17</sup>, we identified genes with highly variable transcriptional profiles and  
108 performed PCA. As anticipated, we observed that the greatest source of variation was between  
109 developmental ages (Figure 1b). Genes associated with negative PC1 loadings (E15.5 cells) were  
110 enriched for gene sets consistent with mitotically active neuronal, undifferentiated precursors  
111 (Figure 1c). In contrast, genes associated with positive PC1 loadings (P7 cells) were enriched for  
112 ontology terms associated with mature, post-mitotic neurons (Figure 1c). This initial analysis  
113 establishes our capacity to discriminate among biological classes present in our data using PCA  
114 as a foundation.

115

116 Further, we attempted to identify clusters of single cells between and within timepoints and  
117 anatomical regions. In order to do this, we selected the PCs that described the most variance in  
118 the data and used t-Stochastic Neighbor Embedding (t-SNE)<sup>18</sup> to further cluster cells in an  
119 unsupervised manner (see Methods). Analysis of all cells revealed that the E15.5 cells from both  
120 MB and FB cluster together (Figure 1d), supporting the notion that they are less differentiated.  
121 By contrast, cells isolated at P7 mostly cluster by anatomical region, suggesting progressive  
122 functional divergence with time (Figure 1d). We next applied this same scRNA-seq analysis  
123 workflow (See Methods) in a recursive manner individually in all regions at both timepoints to  
124 further explore heterogeneity. This revealed a total of 13 clusters (E15.5 FB.1-2, MB.1-2; P7

125 OB.1-3, FB.1-2, MB.1-4; Figure 1e), demonstrating the diversity of DA neuron subtypes and  
126 providing a framework upon which to evaluate the biological context of genetic association  
127 signals across closely-related cell types. Using known markers, we confirmed that all clusters  
128 expressed high levels of pan-neuronal markers (*Snap25*, *Eno2*, and *Syt1*) (Supplementary Figure  
129 2a). In contrast, we observed scant evidence of astrocyte (*Aldh1l1*, *Slc1a3*, *Aqp4*, and *Gfap*;  
130 Supplementary Figure 2a) or oligodendrocyte markers (*Mag*, *Mog*, and *Mbp*; Supplementary  
131 Figure 2a), thus confirming we successfully isolated our intended substrate, *Th*<sup>+</sup> neurons.

132

133 *scRNA-seq revealed biologically and temporally discriminating transcriptional signatures*

134 With subpopulations of DA neurons defined in our data, we set out to assign a biological identity  
135 to each cluster. Among the four clusters identified at E15.5, two were represented in t-SNE space  
136 as a single large group that included cells from both MB and FB (E15.MB.1, E15.FB.1), leaving  
137 two smaller clusters that were comprised solely of MB or FB cells (Supplementary Figure 3a).  
138 The latter MB cluster (E15.MB.2; Supplementary Figure 3a, Supplementary Figure 3b)  
139 specifically expressed *Foxa1*, *Lmx1a*, *Pitx3*, and *Nr4a2* and thus likely represents a post-mitotic  
140 DA neuron population<sup>19</sup> (Supplementary Table 2; Supplementary Table 3). Similarly, the  
141 discrete E15.FB.2 cluster expressed markers of post-mitotic FB/hypothalamic neurons  
142 (Supplementary Figure 3b), including *Six3*, *Six3os1*, *Sst*, and *Npy* {Supplementary Table 2;  
143 Supplementary Table 3}. These embryonic data did not discriminate between cells populating  
144 known domains of DA neurons, such as the SN.

145

146 By contrast, P7 cells mostly cluster by anatomical region and each region has defined subsets  
147 (Figure 1d, 1e, 2a). Analysis of P7 FB revealed two distinct cell clusters (Figure 2b). Expression

148 of the neuropeptides *Gal* and *Ghrh* and the *Gsx1* transcription factor place P7.FB.1 cells in the  
149 arcuate nucleus (Supplementary Table 2; Supplementary Table 3)<sup>20-23</sup>. The identity of P7.FB.2,  
150 however, was less clear, although subsets of cells therein did express other arcuate nucleus  
151 markers for *Th*<sup>+</sup>/*Ghrh*<sup>-</sup> neuronal populations e.g. *Onecut2*, *Arx*, *Prlr*, *Slc6a3*, and *Sst*  
152 (Supplementary Figure 3c; Supplementary Table 3)<sup>23</sup>. All three identified OB clusters (Figure  
153 2c) express marker genes of OB DA neuronal development or survival (Supplementary Table 2,  
154 Supplementary Table 3; Supplementary Figure 3d)<sup>24</sup>. It has previously been reported that *Dcx*  
155 expression diminishes with neuronal maturation<sup>25</sup> and *Snap25* marks mature neurons<sup>26</sup>. We  
156 observe that these OB clusters seem to reflect this continuum of maturation wherein expression  
157 of *Dcx* diminishes and *Snap25* increases with progression from P7.OB1 to OB3 (Supplementary  
158 Figure 3d). This pattern is mirrored by a concomitant increase in OB DA neuron fate  
159 specification genes (Supplementary Figure 3d)<sup>24,27</sup>. In addition, we identified four P7 MB DA  
160 subset clusters (Figure 2d). Marker gene analysis confirmed that three of the clusters correspond  
161 to DA neurons from the VTA (*Otx2* and *Neurod6*; P7.MB.1)<sup>28,29</sup>, the PAG (*Vip* and *Pnoc*;  
162 P7.MB.3)<sup>30,31</sup>, and the SN (*Sox6*, *Aldh1a7*, *Ndnf*, *Serpine2*, *Rbp4*, and *Fgf20*; P7.MB.4)<sup>28,32-34</sup>  
163 (Supplementary Table 2; Supplementary Table 3). These data are consistent with recent scRNA-  
164 seq studies of similar populations<sup>33,35</sup>. Through this marker gene analysis, we successfully  
165 assigned a biological identity to 12/13 clusters.

166

167 The only cluster without a readily assigned identity was P7.MB.2. This population of P7 MB DA  
168 neurons, P7.MB.2 (Figure 2d), is likely a progenitor-like population. Like the overlapping  
169 E15.MB.1 and E15.FB.1 clusters (Supplementary Figure 3a), this cluster preferentially expresses  
170 markers of neuronal precursors/differentiation/maturation {Supplementary Table 2,



171 Supplementary Table 3}. In addition to sharing markers with the progenitor-like E15.MB.1  
172 cluster, P7.MB.2 exhibits gene expression consistent with embryonic mouse neuroblast  
173 populations<sup>33</sup>, cell division, and neuron development<sup>36-40</sup> (Supplementary Table 2,  
174 Supplementary Table 3). Consistent with the hypothesis, this population displayed lower levels  
175 of both *Th* and *Slc6a3*, markers of mature DA neurons, than the terminally differentiated and  
176 phenotypically discrete P7 MB DA neuron populations of the VTA, SN and PAG (Figure 2e).  
177  
178 With this hypothesis in mind, we sought to ascertain the spatial distribution of P7.MB.2 DA  
179 neurons through multiplex, single molecule fluorescence *in situ* hybridization (smFISH) for *Th*  
180 (pan-P7 MB DA neurons), *Slc6a3* (P7.MB.1, P7.MB.3, P7.MB.4), and one of the neuroblast  
181 marker genes identified through our analysis, either *Lhx9* or *Ldb2* (P7.MB.2) (Figure 2e). In each  
182 experiment, we scanned the ventral midbrain for cells that were *Th*+/*Slc6a3*- and positive for the  
183 third gene. *Th*+/*Slc6a3*-/*Lhx9*+ cells were found scattered in the dorsal SN *pars compacta*  
184 (SNpc) along with cells expressing *Lhx9* alone (Figure 2f, 2h). Expression of *Ldb2* was found to  
185 have a similar pattern to *Lhx9*, with *Th*+/*Slc6a3*-/*Ldb2*+ cells found in the dorsal SNpc (Figure  
186 2f, 2h). Expression of *Lhx9* and *Ldb2* was low or non-existent in *Th*+/*Slc6a3*+ cells in the SNpc  
187 (Figure 2e, 2f). Importantly, cells expressing these markers express *Th* at lower levels than  
188 *Th*+/*Slc6a3*+ neurons (Figure 2f, 2g), consistent with our scRNA-seq data (Figure 2e). Thus,  
189 with the resolution of the spatial distribution of this novel neuroblast-like P7 MB DA population,  
190 we assign biological identity to each defined brain DA subpopulation.  
191  
192 *Novel SN-specific transcriptional profiles and GRNs highlight its association with PD*

193 Overall our analyses above allowed us to successfully separate and identify 13 brain DA  
194 neuronal populations present at E15.5 and P7, including SN DA neurons. Motivated by the  
195 clinical relevance of SN DA neurons to PD, we set out to understand what makes them  
196 transcriptionally distinct from the other MB DA neuron populations.

197

198 In order to look broadly at neuronal subtypes, we evaluated expression of canonical markers of  
199 other neuronal subtypes in our *Th*<sup>+</sup> neuron subpopulations. Interestingly, we observed  
200 inconsistent detection of *Th* and eGFP in some E15.5 clusters (Supplementary Figure 2b). This  
201 likely reflects lower *Th* transcript abundance at this developmental state, but sufficient  
202 expression of the eGFP reporter to permit FACS collection (Supplementary Figure 2c). The  
203 expression of other DA markers, *Ddc* and *Slc18a2*, mirror *Th* expression, while *Slc6a3*  
204 expression is more spatially and temporally restricted (Supplementary Figure 2b). The SN cluster  
205 displays robust expression of all canonical DA markers (Supplementary Figure 2b). Multiple  
206 studies have demonstrated that *Th*<sup>+</sup> neurons may also express markers characteristic of other  
207 major neuronal subtypes<sup>41-43</sup>. We found that only the SN and PAG showed no expression of  
208 either GABAergic (*Gad1/Gad2/Slc32a1*) or glutamatergic (*Slc17a6*) markers (Supplementary  
209 Figure 2b). This neurotransmitter specificity is a potential avenue for exploring the preferential  
210 vulnerability of the SN in PD.

211

212 Next, we postulated that genes whose expression defined the P7 SN DA neuron cluster might  
213 illuminate their preferential vulnerability in PD. We identified 110 SN-specific genes, by first  
214 finding all differentially expressed genes between P7 subset clusters and then using the Jensen-  
215 Shannon distance to identify cluster specific genes (See Methods). Prior reports confirm the

216 expression of 49 of the 110 SN-specific genes (~45%) in postnatal SN (Supplementary Table 4).  
217 We then sought evidence to confirm or exclude SN expression for the remaining, novel 61 genes  
218 (55%). Of these, 25/61 (~41%) were detected in adult SN neurons by *in situ* hybridization (ISH)  
219 of coronal sections in adult (P56) mice (Allen Brain Atlas, ABA; [http://developingmouse.brain-](http://developingmouse.brain-map.org)  
220 [map.org](http://developingmouse.brain-map.org)), including *Col25a1*, *Fam184a*, *Ankrd34b*, *Nwd2*, and *Cadps2* (Figure 3, Supplementary  
221 Table 5). Only 4/61 genes, for which ISH data existed in the ABA, lacked clear evidence of  
222 expression in the adult SN (Supplementary Table 5). The ABA lacked coronal ISH data on 32/61  
223 genes, thus we were unable to confirm their presence in the SN. Collectively, we identify 110  
224 postnatal SN DA marker genes and confirm the expression of those genes in the adult mouse SN  
225 for 74 (67%) of them, including 25 novel markers of this clinically relevant cell population that  
226 we confirmed using the ABA image catalog.

227  
228 We next asked whether we could identify significant relationships between cells defined as being  
229 P7 SN DA neurons and distinctive transcriptional signatures in our data. We identify 16 co-  
230 expressed gene modules by performing weighted gene co-expression network analysis  
231 (WGCNA)<sup>44,45</sup> on all expressed genes of the P7 subset (Supplementary Figure 4; Supplementary  
232 Table 6). By calculating pairwise correlations between modules and P7 subset clusters, we reveal  
233 that 7/16 modules are significantly and positively correlated (Bonferroni corrected  $p < 3.5e-04$ )  
234 with at least one subset cluster (Figure 3c). We graphically represent the eigenvalues for each  
235 module in each cell in P7 t-SNE space, confirming that a majority of these significant modules  
236 (6/7) displayed robust spatial, isotype enrichment (Figure 3d).

237

238 In order identify the biological relevance of these modules, each module was tested for  
239 enrichment for Kyoto Encyclopedia of Genes and Genomes (KEGG) pathways, Gene Ontology  
240 (GO) gene sets, and Reactome gene sets. Two modules, the “brown” and “green” modules, were  
241 significantly associated with the Parkinson’s Disease KEGG pathway gene set (Figure 3c;  
242 Supplementary Table 7). Interestingly, the “brown” module was also significantly correlated  
243 with the P7 VTA population (P7.MB.1) and enriched for addiction gene sets (Supplementary  
244 Table 7) highlighting the link between VTA DA neurons and addiction<sup>46</sup>. Strikingly, only the P7  
245 SN cluster was significantly correlated with both PD-enriched modules (Figure 3c). This specific  
246 correlation suggests these gene modules may play a role in the preferential susceptibility of the  
247 SN in PD.

248

249 *Integrating SN DA neuron specific data enables prioritization of genes within PD-associated*  
250 *intervals*

251 With these context-specific data in hand, we posited that SN DA neuron-specific genes and the  
252 broader gene co-expression networks that correlate with SN DA neurons might be used to  
253 prioritize genes within loci identified in PD GWAS. Such a strategy would be agnostic to prior  
254 biological evidence and independent of genic position relative to the lead SNP, the traditional  
255 method used to prioritize causative genes.

256

257 To investigate pertinent genes within PD GWAS loci, we identified all human genes within  
258 topologically associated domains (TADs) and a two megabase interval encompassing each PD-  
259 associated lead SNP. TADs were chosen because regulatory DNA impacted by GWAS variation  
260 is more likely to act on genes within their own TAD<sup>47</sup>. While topological data does not exist for

261 SN DA neurons, we use TAD boundaries from hESCs as a proxy, as TADs are generally  
262 conserved across cell types<sup>48</sup>. To improve our analyses, we also selected +/- 1 megabase interval  
263 around each lead SNP thus including the upper bounds of reported enhancer-promoter  
264 interactions<sup>49,50</sup>. All PD GWAS SNPs interrogated were identified by the most recent meta-  
265 analysis (32 SNPs in total)<sup>11</sup>, implicating a total of 1132 unique genes. We then identified  
266 corresponding one-to-one mouse to human homologs (670/1132; ~59%), primarily through the  
267 Mouse Genome Informatics homology database (Methods).

268  
269 To prioritize these genes in GWAS loci, we developed a gene-centric score that integrates our  
270 data as well as data in the public domain. We began by intersecting the PD loci genes with our  
271 scRNA-seq data as well as previously published SN DA expression data<sup>33</sup>, identifying 285 genes  
272 (285/670; ~43%) with direct evidence of expression in SN DA neurons in at least one dataset.  
273 Each PD-associated interval contained  $\geq 1$  SN-expressed gene (Table 1; Supplementary Table 8).  
274 Emphasizing the need for a novel, systematic strategy, in 13/32 GWA intervals (~41%), the most  
275 proximal gene to the lead SNP was not detectably expressed in mouse SN DA neuron  
276 populations (Table 1; Supplementary Table 8). Surprisingly, two loci contained only one SN  
277 DA-expressed gene (Table 1): *Mmp16* (*MMP16* locus) and *Tsnax* (*SIPAIL2* locus) (Figure 4a).  
278 The relevance of these candidate genes to neuronal function/dysfunction is well supported<sup>51,52</sup>.  
279 This establishes gene expression in a relevant tissue as a powerful tool in the identification of  
280 causal genes.

281  
282 In order to prioritize likely diseases-associated genes in the remaining 30 loci, we scored genes  
283 on three criteria: whether genes were identified as specific markers for the P7.MB.4 (SN) cluster

284 (Supplementary Table 2), whether the genes were differentially expressed between all P7 DA  
285 neuron populations, and whether the genes were included in PD gene set enriched and SN  
286 correlated gene modules uncovered in WGCNA (Supplementary Table 6). This strategy  
287 facilitated further prioritization of a single gene in 14 additional loci including *SNCA*, *LRRK2*,  
288 and *GCHI* loci (Figure 4a; Table 1). Importantly, using this approach we indict the familial PD  
289 gene encoding alpha-synuclein (*SNCA*), as responsible for the observed PD association within  
290 4q22.1 (Figure 4a, Table 1). Thus, by using context-specific data alone, we were able to  
291 prioritize a single candidate gene in exactly half of the PD-GWAS associated loci.

292  
293 Furthermore, at loci in which a single gene did not emerge, we identified dosage sensitive genes  
294 by considering the probability of being loss-of-function (LoF) intolerant (pLI) metric from the  
295 ExAC database<sup>53,54</sup>. Since most GWAS variation is predicted to impact regulatory DNA and in  
296 turn impact gene expression, it follows that genes in GWAS loci that are more sensitive to  
297 dosage levels may be more likely to be candidate genes. With that in mind, the pLI for each gene  
298 was used to further “rank” the genes within loci where a single gene was not prioritized. For  
299 those loci, including *MAPT* and *DDRGKI* loci (Figure 4a), we report a group of top scoring  
300 candidate genes ( $\leq 5$ ) (Table 1). Expression of prioritized genes in the adult SN adds to the  
301 validity of the genes identified as possible candidates (Figure 4b).

302  
303 Two interesting examples that emerge from this scoring are found at the *MAPT* and *TMEM175*-  
304 *GAK-DGKQ* loci. Although *MAPT* has previously been implicated in multiple neurodegenerative  
305 phenotypes, including PD (OMIM: 168600), we instead prioritize two genes before it (*CRHRI*  
306 and *NSF*; Table 1). We detect *Mapt* and *Nsf* expression consistently across all assayed DA

307 neurons (Figure 4c). By contrast, expression of *Crhr1*, encoding the corticotropin releasing  
308 hormone receptor 1, is restricted to P7 DA neurons in the SN and the more mature OB neuronal  
309 populations (Figure 4c). Similarly, at the *TMEM175-GAK-DGKQ* locus, our data shows that  
310 although all three proximal genes are expressed in the SN, the adjacent *CPLX1* was one of the  
311 prioritized gene (Table 1). There are multiple lines of evidence that strengthen *CPLX1* as a  
312 candidate gene. Expression of *CPLX1* is elevated both in the brains of PD patients and the brains  
313 of mice overexpressing the *SNCA* A53T PD mutation<sup>55,56</sup>. Additionally, mice deficient in *CPLX1*  
314 display an early-onset, cerebellar ataxia along with prolonged motor and behavioral  
315 phenotypes<sup>57,58</sup>. However, the impact of *Cplx1* deficiency on the integrity of the nigrostriatal  
316 pathway, to date, has not been explored. In order to confirm *CPLX1* as a candidate gene, we  
317 performed immunohistochemistry (IHC) for *Th* in the *Cplx1* knockout mouse model  
318 (Supplementary Table 9)<sup>57-59</sup>. We measured the density of *Th*+ innervation in the striatum of  
319 *Cplx1* *-/-* mice and controls (Figure 4d, Supplementary Table 10) and found that *Cplx1* *-/-* mice  
320 had significantly lower *Th*+ staining in the striatum (p-value = 3.385e-08; Figure 4e). This  
321 indicates that *Cplx1* KO mice have less *Th*+ fiber innervation and a compromised nigrostriatal  
322 pathway, supporting its biological significance in MB DA populations and to PD.

323

324 The systematic identification of causal genes underlying GWAS signals is essential in order for  
325 the scientific and medical communities to take full advantage of all the GWAS data published  
326 over the last decade. Taken collectively, we demonstrate how scRNA-seq data from disease-  
327 relevant populations can be leveraged to illuminate GWAS results, facilitate systematic  
328 prioritization of GWAS loci implicated in PD, and can leads to the functional characterization of  
329 previously underexplored candidate genes.

330 **DISCUSSION**

331 Midbrain DA neurons in the SN have been the subject of intense research since being  
332 definitively linked to PD nearly 100 years ago<sup>60</sup>. While degeneration of SN DA neurons in PD is  
333 well established, they represent only a subset of brain DA populations. It remains unknown why  
334 nigral DA neurons are particularly vulnerable. We set out to explore this question using scRNA-  
335 seq. Recently, others have used scRNA-seq to characterize the mouse MB, including DA  
336 neurons<sup>33</sup>. Here, we extend these data significantly, extensively characterizing the transcriptomes  
337 of multiple brain DA populations longitudinally and discovering GRNs associated with specific  
338 populations.

339

340 Most importantly, our data facilitate the iterative and biologically informed prioritization of gene  
341 candidates for all PD-associated genomic intervals, the first such systematically generated  
342 dataset. In practice, the gene closest to the lead SNP identified within a GWAS locus is  
343 frequently treated as the prime candidate gene, often without considering tissue-dependent  
344 context. Our study overcomes this by integrating genomic data derived from specific cell  
345 contexts with analyses that are agnostic to one another. We posit that genes pertinent to PD are  
346 likely expressed within SN DA neurons. This hypothesis is consistent with the recent description  
347 of the “omnigenic” nature of common disease, wherein variation impacting genes expressed in a  
348 disease tissue explain the vast majority of risk<sup>7</sup>.

349

350 First, we identify intervals that reveal one primary candidate, i.e. those that harbor only one SN-  
351 expressed gene. Next, we examine those intervals with many candidates, and prioritize based on  
352 a cumulative body of biological evidence. In total, we prioritize 5 or fewer candidates in all 32



353 PD GWAS loci studied, identifying a single gene in sixteen loci (16/32; 50%) and three or fewer  
354 genes in ~84% of loci (27/32). Ultimately this prioritization reduces the candidate gene list for  
355 PD GWAS loci dramatically from 1132 genes to 65 genes.

356

357 The top genes we identify in three PD loci (*SNCA*, *FGF20*, *GCHI*) have been directly associated  
358 with PD, MB DA development, and MB DA function<sup>34</sup> (OMIM: 163890, 128230). Furthermore,  
359 our prioritization of *CPLX1* over other candidates in the *TMEM175-GAK-DGKQ* locus is  
360 supported by multiple lines of evidence. Additionally, we demonstrate that the integrity of the  
361 nigrostriatal pathway is disrupted in *Cplx1* knockout mice. Dysregulation of *CPLX1* RNA is also  
362 a biomarker in individuals with pre-PD prodromal phenotypes harboring the *PARK4* mutation  
363 (*SNCA* gene duplication)<sup>61</sup>. These results validate our approach and strengthen the argument for  
364 the use of context specific data in pinpointing candidate genes in GWAS loci.

365

366 Many of the genes prioritized (Table 1) have been shown to have various mitochondrial  
367 functions<sup>62-68</sup>. The identification of genes associated with mitochondrial functions is especially  
368 interesting in light of the “omnigenic” hypothesis of complex traits<sup>7</sup>. Since mitochondrial  
369 dysfunction has been extensively implicated in PD<sup>69</sup>, the prioritized genes may represent “core”  
370 genes that in turn can affect the larger mitochondrial-associated regulatory networks active in the  
371 disease relevant cell-type (SN DA neurons). It is notable that one of these genes is the presenilin  
372 associated rhomboid like gene or *PARL*. *PARL* cleaves *PINK1*, a gene extensively implicated in  
373 PD pathology and recently a variant in *PARL* has been associated with early-onset PD (OMIM:  
374 607858)<sup>70-72</sup>.

375

376 While our method successfully prioritized one familial PD gene (*SNCA*), we do not prioritize  
377 *LRRK2*, another familial PD gene harbored within a PD GWAS locus. *Lrrk2* is not prioritized  
378 simply because it is not detectably expressed in our SN DA neuronal population. This is  
379 expected as numerous studies have reported little to no *Lrrk2* expression in *Th+* MB DA neurons  
380 both in mice and humans<sup>73,74</sup>. Instead, our method prioritizes *PDZRN4*. This result does not  
381 necessarily argue against the potential relevance of *LRRK2* but instead provides an additional  
382 candidate that may contribute to PD susceptibility. The same logic should be noted for two other  
383 PD-associated loci, wherein our scoring prioritizes different genes (*KCNN3* and *CRHRI/NSF*,  
384 respectively) than one previously implicated in PD (*GBA* and *MAPT*) (OMIM: 168600). Notably,  
385 *KCNN3*, *CRHRI*, and *NSF*, all have previous biological evidence making them plausible  
386 candidates<sup>75-77</sup>.

387

388 Despite this success, we acknowledge several notable caveats. First, not all genes in PD-  
389 associated human loci have identified mouse homologs. Thus, it remains possible that we may  
390 have overlooked the contribution of some genes whose biology is not comprehensively queried  
391 in this study. Secondly, we assume that identified genetic variation acts in a manner that is at  
392 least preferential, if not exclusive, to SN DA neurons. Lastly, by prioritizing SN-expressed  
393 genes, we assume that PD variation affects genes whose expression in the SN does not require  
394 insult/stress. These caveats notwithstanding, our strategy sets the stage for a new generation of  
395 independent and combinatorial functional evaluation of gene candidates for PD-associated  
396 genomic intervals.

397

398

399 **METHODS**

400

401 **Data availability**

402 Raw data will be made available on Sequence Read Archive (SRA) and Gene Expression

403 Omnibus (GEO) prior to publication. Summary data is available where code is available below

404 ([https://github.com/pwh124/DA\\_scRNA-seq](https://github.com/pwh124/DA_scRNA-seq)).

405

406 **Code Availability**

407 Code for analysis, for the production of figures, and summary data is deposited at

408 [https://github.com/pwh124/DA\\_scRNA-seq](https://github.com/pwh124/DA_scRNA-seq)

409

410 **Animals.**

411 The Th:EGFP BAC transgenic mice (Tg(Th-EGFP)DJ76Gsat/Mmnc) used in this study were

412 generated by the GENSAT Project and were purchased through the Mutant Mouse Resource &

413 Research Centers (MMRRC) Repository (<https://www.mmrrc.org/>). Mice were maintained on a

414 Swiss Webster (SW) background with female SW mice obtained from Charles River

415 Laboratories (<http://www.criver.com/>). The Tg(Th-EGFP)DJ76Gsat/Mmnc line was primarily

416 maintained through matings between Th:EGFP positive, hemizygous male mice and wild-type

417 SW females (dams). Timed matings for cell isolation were similarly established between

418 hemizygous male mice and wild-type SW females. The observation of a vaginal plug was

419 defined as embryonic day 0.5 (E0.5). All work involving mice (husbandry, colony maintenance

420 and euthanasia) were reviewed and pre-approved by the institutional care and use committee.

421

422 *Cplx1* knockout mice and wild type littermates used for immunocytochemistry were taken from a  
423 colony established in Cambridge using founder mice that were a kind gift of Drs K. Reim and N.  
424 Brose (Göttingen, Germany). *Cplx1* mice in this colony have been backcrossed onto a C57/Bl6J  
425 inbred background for at least 10 generations. All experimental procedures were licensed and  
426 undertaken in accordance with the regulations of the UK Animals (Scientific Procedures) Act  
427 1986. Housing, rearing and genotyping of mice has been described in detail previously<sup>57,58</sup>.  
428 Mice were housed in hard-bottomed polypropylene experimental cages in groups of 5-10 mice in  
429 a housing facility was maintained at 21 – 23°C with relative humidity of 55 ± 10%. Mice had *ad*  
430 *libitum* access to water and standard dry chow. Because homozygous knockout *Cplx1* mice have  
431 ataxia, they have difficulty in reaching the hard pellets in the food hopper and drinking from the  
432 water bottles. Lowered waterspouts were provided and access to normal laboratory chow was  
433 improved by providing mash (made by soaking 100 g of chow pellets in 230 ml water for 60 min  
434 until the pellets were soft and fully expanded) on the floor of the cage twice daily. *Cplx1*  
435 genotyping to identify mice with a homozygous or heterozygous deletion of the *Cplx1* gene was  
436 conducted as previously described<sup>57</sup>, using DNA prepared from tail biopsies.

#### 437 **Dissection of E15.5 brains.**

438 At 15.5 days after the timed mating, pregnant dams were euthanized and the entire litter of  
439 embryonic day 15.5 (E15.5) embryos were dissected out of the mother and immediately placed  
440 in chilled Eagle's Minimum Essential Media (EMEM). Individual embryos were then  
441 decapitated and heads were placed in fresh EMEM on ice. Embryonic brains were then removed  
442 and placed in Hank's Balanced Salt Solution (HBSS) without Mg<sup>2+</sup> and Ca<sup>2+</sup> and manipulated  
443 while on ice. The brains were immediately observed under a fluorescent stereomicroscope and  
444 EGFP<sup>+</sup> brains were selected. EGFP<sup>+</sup> regions of interest in the forebrain (hypothalamus) and the

445 midbrain were then dissected and placed in HBSS on ice. This process was repeated for each  
446 EGFP<sup>+</sup> brain. Four EGFP<sup>+</sup> brain regions for each region studied were pooled together for  
447 dissociation.

448

#### 449 **Dissection of P7 brains.**

450 After matings, pregnant females were sorted into their own cages and checked daily for newly  
451 born pups. The morning the pups were born was considered day P0. Once the mice were aged to  
452 P7, all the mice from the litter were euthanized and the brains were then quickly dissected out of  
453 the mice and placed in HBSS without Mg<sup>2+</sup> and Ca<sup>2+</sup> on ice. As before, the brains were then  
454 observed under a fluorescent microscope, EGFP<sup>+</sup> status for P7 mice was determined, and EGFP<sup>+</sup>  
455 brains were retained. For each EGFP<sup>+</sup> brain, the entire olfactory bulb was first resected and  
456 placed in HBSS on ice. Immediately thereafter, the EGFP<sup>+</sup> forebrain and midbrain regions for  
457 each brain were resected and also placed in distinct containers of HBSS on ice. Five EGFP<sup>+</sup>  
458 brain regions for each region were pooled together for dissociation.

459

#### 460 **Generation of single cell suspensions from brain tissue.**

461 Resected brain tissues were dissociated using papain (Papain Dissociation System, Worthington  
462 Biochemical Corporation; Cat#: LK003150) following the trehalose-enhanced protocol reported  
463 by Saxena, et. al, 2012<sup>78</sup> with the following modifications: The dissociation was carried out at  
464 37°C in a sterile tissue culture cabinet. During dissociation, all tissues at all time points were  
465 triturated every 10 minutes using a sterile Pasteur pipette. For E15.5 tissues, this was continued  
466 for no more than 40 minutes. For P7, this was continued for up to 1.5 hours or until the tissue  
467 appeared to be completely dissociated.

468

469 Additionally, for P7 tissues, after dissociation but before cell sorting, the cell pellets were passed  
470 through a discontinuous density gradient in order to remove cell debris that could impede cell  
471 sorting. This gradient was adapted from the Worthington Papain Dissociation System kit.  
472 Briefly, after completion of dissociation according to the Saxena protocol<sup>78</sup>, the final cell pellet  
473 was resuspended in DNase dilute albumin-inhibitor solution, layered on top of 5 mL of albumin-  
474 inhibitor solution, and centrifuged at 70g for 6 minutes. The supernatant was then removed.

475

#### 476 **FACS and single-cell collection.**

477 For each timepoint-region condition, pellets were resuspended in 200  $\mu$ L of media without serum  
478 comprised of DMEM/F12 without phenol red, 5% trehalose (w/v), 25  $\mu$ M AP-V, 100  $\mu$ M  
479 kynurenic acid, and 10  $\mu$ L of 40 U/ $\mu$ l RNase inhibitor (RNasin® Plus RNase Inhibitor, Promega)  
480 at room temperature. The resuspended cells were then passed through a 40  $\mu$ M filter and  
481 introduced into a Fluorescence Assisted Cell Sorting (FACS) machine (Beckman Coulter MoFlo  
482 Cell Sorter or Becton Dickinson FACSJazz). Viable cells were identified via propidium iodide  
483 staining, and individual neurons were sorted based on their fluorescence (EGFP+ intensity, See  
484 Supplementary Figure 2c) directly into lysis buffer in individual wells of 96-well plates for  
485 single-cell sequencing (2  $\mu$ L Smart-Seq2 lysis buffer + RNAase inhibitor, 1  $\mu$ L oligo-dT primer,  
486 and 1  $\mu$ L dNTPs according to Picelli et al., 2014<sup>79</sup>). Blank wells were used as negative controls  
487 for each plate collected. Upon completion of a sort, the plates were briefly spun in a tabletop  
488 microcentrifuge and snap-frozen on dry ice. Single cell lysates were subsequently kept at -80°C  
489 until cDNA conversion.

490

491 **Single-cell RT, library prep, and sequencing.**

492 Library preparation and amplification of single-cell samples were performed using a modified  
493 version of the Smart-Seq2 protocol<sup>79</sup>. Briefly, 96-well plates of single cell lysates were thawed to  
494 4°C, heated to 72°C for 3 minutes, then immediately placed on ice. Template switching first-  
495 strand cDNA synthesis was performed as described above using a 5'-biotinylated TSO oligo.  
496 cDNAs were amplified using 20 cycles of KAPA HiFi PCR and 5'-biotinylated ISPCR primer.  
497 Amplified cDNA was cleaned with a 1:1 ratio of Ampure XP beads and approximately 200 pg  
498 was used for a one-quarter standard sized Nextera XT tagmentation reaction. Tagmented  
499 fragments were amplified for 14 cycles and dual indexes were added to each well to uniquely  
500 label each library. Concentrations were assessed with Quant-iT PicoGreen dsDNA Reagent  
501 (Invitrogen) and samples were diluted to ~2 nM and pooled. Pooled libraries were sequenced on  
502 the Illumina HiSeq 2500 platform to a target mean depth of  $\sim 8.0 \times 10^5$  50bp paired-end  
503 fragments per cell at the Hopkins Genetics Research Core Facility.

504

505 **RNA sequencing and alignment.**

506 For all libraries, paired-end reads were aligned to the mouse reference genome (mm10)  
507 supplemented with the Th-EGFP<sup>+</sup> transgene contig, using HISAT2<sup>80</sup> with default parameters  
508 except: -p 8. Aligned reads from individual samples were quantified against a reference  
509 transcriptome (GENCODE vM8)<sup>81</sup> supplemented with the addition of the eGFP transcript.  
510 Quantification was performed using cuffquant with default parameters and the following  
511 additional arguments: --no-update-check -p 8. Normalized expression estimates across all  
512 samples were obtained using cuffnorm<sup>82</sup> with default parameters.

513

514 **Single-cell RNA data analysis.**

515 *Expression estimates.*

516 Gene-level and isoform-level FPKM (Fragments Per Kilobase of transcript per Million) values  
517 produced by cuffquant<sup>82</sup> and the normalized FPKM matrix from cuffnorm was used as input for  
518 the Monocle 2 single cell RNA-seq framework<sup>83</sup> in R/Bioconductor<sup>84</sup>. Genes were annotated  
519 using the Gencode vM8 release<sup>81</sup>. A CellDataSet was then created using Monocle (v2.2.0)<sup>83</sup>  
520 containing the gene FPKM table, gene annotations, and all available metadata for the sorted  
521 cells. All cells labeled as negative controls and empty wells were removed from the data.

522 Relative FPKM values for each cell were converted to estimates of absolute mRNA counts per  
523 cell (RPC) using the Monocle 2 Census algorithm<sup>16</sup> using the Monocle function “relative2abs.”  
524 After RPCs were inferred, a new cds was created using the estimated RNA copy numbers with  
525 the expression Family set to “negbinomial.size()” and a lower detection limit of 0.1 RPC.

526

527 *QC Filtering.*

528 After expression estimates were inferred, the cds containing a total of 473 cells was run through  
529 Monocle’s “detectGenes” function with the minimum expression level set at 0.1 transcripts. The  
530 following filtering criteria were then imposed on the entire data set:

531

532 i. Number of expressed genes - The number of expressed genes detected in each cell in the  
533 dataset was plotted and the high and low expressed gene thresholds were set based on  
534 observations of each distribution. Only those cells that expressed between 2,000 and 10,000  
535 genes were retained.

536



537 ii. Cell Mass - Cells were then filtered based on the total mass of RNA in the cells calculated by  
538 Monocle. Again, the total mass of the cell was plotted and mass thresholds were set based on  
539 observations from each distribution. Only those cells with a total cell mass between 100,000 and  
540 1,300,000 fragments mapped were retained.

541  
542 iii. Total RNA copies per cell - Cells were then filtered based on the total number of RNA  
543 transcripts estimated for each cell. Again, the total RNA copies per cell was plotted and RNA  
544 transcript thresholds were set based on observations from each distribution. Only those cells with  
545 a total mRNA count between 1,000 and 40,000 RPCs were retained.

546  
547 A total of 410 individual cells passed these initial filters. Outliers found in subsequent, reiterative  
548 analyses described below were analyzed and removed resulting a final cell number of 396. The  
549 distributions for total mRNAs, total mass, and number of expressed, can be found in  
550 Supplementary Figure 1.

551  
552 *Log distribution QC.*

553 Analysis using Monocle relies on the assumption that the expression data being analyzed follows  
554 a log-normal distribution. Comparison to this distribution was performed after initial filtering  
555 prior to continuing with analysis and was observed to be well fit.

556

557 **Reiterative single-cell RNA data analysis.**

558 After initial filtering described above, the entire cds as well as subsets of the cds based on “age”  
559 and “region” of cells were created for recursive analysis. Regardless of how the data was  
560 subdivided, all data followed a similar downstream analysis workflow.

561

562 *Determining number of cells expressing each gene.*

563 The genes to be analyzed for each iteration were filtered based on the number of cells that  
564 expressed each gene. Genes were retained if they were expressed in  $> 5\%$  of the cells in the  
565 dataset being analyzed. These are termed “expressed\_genes.” For example, when analyzing all  
566 cells collected together ( $n = 410$ ), a gene had to be expressed in 20.5 cells ( $410 \times 0.05 = 20.5$ ) to  
567 be included in the analysis. Whereas when analyzing P7 MB cells ( $n = 80$ ), a gene had to be  
568 expressed in just 4 cells ( $80 \times 0.05 = 4$ ). This was done to include genes that may define rare  
569 populations of cells that could be present in any given population.

570

571 *Monocle model preparation.*

572 The data was prepared for Monocle analysis by retaining only the expressed genes that passed  
573 the filtering described above. Size factors were estimated using Monocle’s  
574 “estimateSizeFactors()” function. Dispersions were estimated using the “estimateDispersions()”  
575 function.

576

577 *High variance gene selection.*

578 Genes that have a high biological coefficient of variation (BCV) were identified by first  
579 calculating the BCV by dividing the standard deviation of expression for each expressed gene by  
580 the mean expression of each expressed gene. A dispersion table was then extracted using the

581 dispersionTable() function from Monocle. Genes with a mean expression > 0.5 transcripts and a  
582 “dispersion\_empirical”  $\geq 1.5 * \text{dispersion\_fit}$  or  $2.0 * \text{dispersion\_fit}$  were identified as “high  
583 variance genes.”

584

585 *Principal component analysis (PCA).*

586 PCA was then run using the R “prcomp” function on the centered and scaled log<sub>2</sub> expression  
587 values of the “high variance genes.” PC1 and PC2 were then visualized to scan the data for  
588 obvious outliers as well as bias in the PCs for age, region, or plates on which the cells were  
589 sequenced. If any visual outliers in the data was observed, those cells were removed from the  
590 original subsetted cds and all filtering steps above were repeated. Once there were no obvious  
591 visual outliers in PC1 or PC2, a screeplot was used plot the PCA results in order to determine the  
592 number of PCs that contributed most significantly to the variation in the data. This was manually  
593 determined by inspecting the screeplot and including only those PCs that occur before the  
594 leveling-off of the plot.

595

596 *t-SNE and clustering.*

597 Once the number of significant PCs was determined, t-Distributed Stochastic Neighbor  
598 Embedding (t-SNE)<sup>18</sup> was used to embed the significant PC dimensions in a 2-D space for  
599 visualization. This was done using the “tsne” package available through R with “whiten =  
600 FALSE.” The parameters “perplexity” and “max\_iter” were tested with various values and set  
601 according what was deemed to give the cleanest clustering of the data.

602

603 After dimensionality reduction via t-SNE, the number of clusters was determined in an unbiased  
604 manner by fitting multiple Gaussian distributions over the 2D t-SNE projection coordinates using  
605 the R package ADPclust<sup>85</sup> and the t-SNE plots were visualized using a custom R script. The  
606 number of genes expressed and the total mRNAs in each cluster were then compared.

607

### 608 **Differential expression Analyses.**

609 Since the greatest source of variation in the data was between ages (Figure 1), differential  
610 expression analyses and downstream analyses were performed separately for each age.

611

612 In order to find differentially expressed genes between brain DA populations at each age, the  
613 E15.5 and P7 datasets were annotated with regional cluster identity (“subset cluster”).

614 Differential expression analysis was performed using the “differentialGeneTest” function from  
615 Monocle that uses a likelihood ratio test to compare a vector generalized additive model  
616 (VGAM) using a negative binomial family function to a reduced model in which one parameter  
617 of interest has been removed. In practice, the following models were fit:

618

619 “~subset.cluster” for E15.5 or P7 dataset

620

621 Genes were called as significantly differentially expressed if they had a q-value (Benjamini-  
622 Hochberg corrected p-value) < 0.05.

623

### 624 **Cluster specific marker genes.**

625 In order to identify differentially expressed genes that were “specifically” expressed in a  
626 particular subset cluster, R code calculating the Jensen-Shannon based specificity score from the  
627 R package cummeRbund<sup>86</sup> was used similar to what was described in Burns *et al*<sup>87</sup>.

628  
629 Briefly, the mean RPC within each cluster for each expressed gene as well as the percentage of  
630 cells within each cluster that express each gene at a level > 1 transcript were calculated. The  
631 “.specificity” function from the cummRbund package was then used to calculate and identify the  
632 cluster with maximum specificity of each gene’s expression. Details of this specificity metric can  
633 be found in Molyneaux, *et al*<sup>88</sup>.

634  
635 To identify subset cluster specific genes, the distribution of specificity scores for each subset  
636 cluster was plotted and a specificity cutoff was chosen so that only the “long right tail” of each  
637 distribution was included (i.e. genes with a specificity score above the cutoff chosen). For each  
638 iterative analysis, the same cutoff was used for each cluster or region (specificity  $\geq 0.4$ ). Once the  
639 specificity cutoff was chosen, genes were further filtered by only retaining genes that were  
640 expressed in  $\geq 40\%$  of cells within the subset cluster that the gene was determined to be  
641 specific for.

642

### 643 **Gene Set Enrichment Analyses.**

644 Gene set enrichment analyses were performed in two separate ways depending upon the  
645 situation. A Gene Set Enrichment Analysis (GSEA) PreRanked analysis was performed when a  
646 ranked list (e.g. genes ranked by PC1 loadings) using GSEA software available from the Broad  
647 Institute (v2.2.4)<sup>89,90</sup>. Ranked gene lists were uploaded to the GSEA software and a

648 “GSEAPreRanked” analysis was performed with the following settings: ‘Number of  
649 Permutations’ = 1000, ‘Collapse dataset to gene symbols’ = true, ‘Chip platform(s)’ =  
650 GENE\_SYMBOL.chip, and ‘Enrichment statistic’ = weighted. Analysis was performed against  
651 Gene Ontology (GO) collections from MSigDB, including c2.all.v5.2.symbols and  
652 c5.all.v5.2.symbols. Top ten gene sets were reported for each analysis (Supplementary Table 1).  
653 Figures and tables displaying the results were produced using custom R scripts.

654

655 Unranked GSEA analyses for lists of genes was performed using hypergeometric tests from the  
656 R package clusterProfiler implemented through the functions ‘enrichGO’, ‘enrichKEGG’, and  
657 ‘enrichPathway’ with ‘pvalueCutoff’ set at 0.01, 0.1, 0.1, respectively with default settings<sup>91</sup>.  
658 These functions were implemented through the ‘compareCluster’ function when analyzing  
659 WGCNA data.

660

### 661 **Weighted Gene Co-Expression Network Analysis (WGCNA).**

662 WGCNA was performed in R using the WGCNA package (v1.51)<sup>44,45</sup> following established  
663 pipelines laid out by the packages authors (see  
664 <https://labs.genetics.ucla.edu/horvath/CoexpressionNetwork/Rpackages/WGCNA/> for more  
665 detail). Briefly, an expression matrix for all P7 neurons containing all genes expressed in  $\geq 20$   
666 cells ( $n = 12628$ ) was used with expression counts in  $\log_2(\text{Transcripts} + 1)$ . The data were  
667 initially clustered in order to identify and remove outliers ( $n = 1$ ) to leave 223 total cells  
668 (Supplementary Figure 4a). The soft threshold (power) for WGCNA was then determined by  
669 calculating the scale free topology model fit for a range of powers (1:10, 12, 14, 16, 18, 20)  
670 using the WGCNA function “pickSoftThreshold()” setting the networkType = “signed”. A power

671 of 10 was then chosen based on the leveling-off of the resulting scale independence plot above  
672 0.8 (Supplementary Figure 4b). Network adjacency was then calculated using the WGCNA  
673 function “adjacency()” with the following settings: power = 10 and type = “signed.” Adjacency  
674 calculations were used to then calculate topological overlap using the WGCNA function  
675 “TOMsimilarity()” with the following settings: TOMtype = “signed.” Distance was then  
676 calculated by subtracting the topological overlap from 1. Hierarchical clustering was then  
677 performed on the distance matrix and modules were identified using the “cuttreeDynamic”  
678 function from the dynamicTreeCut package<sup>92</sup> with the following settings: deepSplit = T;  
679 pamRespectsDendro = FALSE, and minClusterSize = 20. This analysis initially identified 18  
680 modules. Eigengenes for each module were then calculated using the “moduleEigengenes()”  
681 function and each module was assigned a color. Two modules (“grey” and “turquoise”) were  
682 removed at this point. Turquoise was removed because it contained 11567 genes or all the genes  
683 that could not be grouped with another module. Grey was removed because it only contained 4  
684 genes, falling below the minimum set module size of 20. The remaining 16 modules were  
685 clustered (Supplementary Figure 4c) and the correlation between module eigengenes and subset  
686 cluster identity was calculated using custom R scripts. Significance of correlation was  
687 determined by calculated the Student asymptotic p-value for correlations by using the WGCNA  
688 “corPvalueStudent()” function. Gene set enrichments for modules were determined by using the  
689 clusterProfiler R package<sup>91</sup>. The correlation between the t-SNE<sup>91</sup> position of a cell and the module  
690 eigengenes was calculated using custom R scripts.

691

## 692 **Prioritizing Genes in PD GWAS Loci.**

693 *Topologically Associated Domain (TAD) and Megabase Gene Data.*

694 The data for human TAD boundaries were obtained from human embryonic stem cell (hESC)  
695 Hi-C data<sup>48</sup> and converted from human genome hg18 to hg38 using the liftOver tool from UCSC  
696 Genome Browser (<http://genome.ucsc.edu/>). PD GWAS SNP locations in hg38 were intersected  
697 with the TAD information to identify TADs containing a PD GWAS SNP. The data for +/- 1  
698 megabase regions surrounding PD GWAS SNPs was obtained by taking PD GWAS SNP  
699 locations in hg38 and adding or subtracting 1e+06 from each location. All hg38 Ensembl  
700 (version 87) genes that fell within the TADs or megabase regions were then identified by using  
701 the biomaRt R package<sup>93,94</sup>. All genes were then annotated with PD locus and SNP information.  
702 Mouse homologs for all genes were identified using human to mouse homology data from  
703 Mouse Genome Informatics (MGI)  
704 ([http://www.informatics.jax.org/downloads/reports/HOM\\_MouseHumanSequence.rpt](http://www.informatics.jax.org/downloads/reports/HOM_MouseHumanSequence.rpt); Date  
705 accessed: 07/07/2017). Homologs of protein coding genes that did not have a mouse homolog in  
706 the data above were manually curated by searching the human gene name in the MGI database  
707 (<http://www.informatics.jax.org/>). Of the 462 genes with no mouse homologs, only 60 (60/462,  
708 ~13%) were annotated as protein coding genes (Supplementary Figure 5). 17 loci include at least  
709 one protein coding gene with no identified, one-to-one mouse homolog (Supplementary Figure  
710 5). All 670 genes with mouse homologs are annotated as “protein\_coding.” Genes homologs  
711 were manually annotated if a homolog was found to exist. The TAD and megabase tables were  
712 then combined to create a final PD GWAS locus-gene table.

713

#### 714 *PD GWAS Loci Gene Scoring.*

715 Genes within PD GWAS loci were initially scored using two gene lists: Genes with an average  
716 expression  $\geq 0.5$  transcripts in the SN cluster in our data (points = 1) and genes with an average



717 expression  $\geq 0.5$  transcripts in the SN population in La Manno, *et al*<sup>33</sup> (points = 1). Further  
718 prioritization was accomplished by using three gene lists: genes that were differentially  
719 expressed between subset clusters (points = 1); Genes found to be “specifically” expressed in the  
720 P7 MB SN cluster (points = 1); Genes found in the WGCNA modules that are enriched for PD  
721 (points = 1). Expression in the SN cluster was considered the most important feature and was  
722 weighted as such through the use of two complementary datasets with genes found to be  
723 expressed in both receiving priority. Furthermore, a piece of external data, pLI scores for each  
724 gene from the ExAC database<sup>54</sup>, was added to the scores in order to rank loci that were left with  
725  $\geq 2$  genes in the loci after the initial scoring. pLI scores  
726 (fordist\_cleaned\_exac\_r03\_march16\_z\_pli\_rec\_null\_data.txt) were obtained from  
727 <http://exac.broadinstitute.org/> (Date downloaded: March 30, 2017).

728

### 729 **In situ hybridization.**

730 *In situ* hybridization data was downloaded from publically available data from the Allen Institute  
731 through the Allen Brain Atlas (<http://www.brain-map.org/>). The image used in Figure 3a was  
732 obtained from the Reference Atlas at the Allen Brain Atlas ([http://mouse.brain-](http://mouse.brain-map.org/static/atlas)  
733 [map.org/static/atlas](http://mouse.brain-map.org/static/atlas)). URLs for all Allen Brain Atlas *in situ* data analyzed and downloaded for  
734 SN marker genes (Figure 3b) are available in Supplementary Table 6. Data for SN expression *in*  
735 *situ* data for PD GWAS genes (Figure 4b) were obtained from the following experiments: 1056  
736 (*Th*), 79908848 (*Snca*), 297 (*Crhr1*), 74047915 (*Atp6v1d*), 72129224 (*Mmp16*), and 414 (*Cntn1*).  
737 Data accessed on 03/02/17.

738

### 739 **Single molecule in situ hybridization (smFISH).**

740 For *in situ* hybridization experiments, untimed pregnant Swiss Webster mice were ordered from  
741 Charles River Laboratories (Crl:CFW(SW); <http://www.criver.com/>). Mice were maintained as  
742 previously described. Pups were considered P0 on the day of birth. At P7, the pups were  
743 decapitated, the brain was quickly removed, and the brain was then washed in 1x PBS. The intact  
744 brain was then transferred to a vial containing freshly prepared 4% PFA in 1x PBS and incubated  
745 at 4°C for 24 hours. After 24 hours, brains were removed from PFA and washed three times in 1x  
746 PBS. The brains were then placed in a vial with 10% sucrose at 4°C until the brains sunk to the  
747 bottom of the vial (usually ~1 hour). After sinking, brains were immediately placed in a vial  
748 containing 30% sucrose at 4°C until once again sinking to the bottom of the vial (usually  
749 overnight). After cryoprotection, the brains were quickly frozen in optimal cutting temperature  
750 (O.C.T.) compound (Tissue-Tek) on dry ice and stored at -80°C until use. Brains were sectioned  
751 at a thickness of 14 micrometers and mounted on Superfrost Plus microscope slides  
752 (Fisherbrand, Cat. # 12-550-15) with two sections per slide. Sections were then dried at room  
753 temperature for at least 30 minutes and then stored at -80°C until use.

754  
755 RNAscope *in situ* hybridization (<https://acdbio.com/>) was used to detect single RNA transcripts.  
756 RNAscope probes were used to detect *Th* (C1; Cat No. 317621, Lot: 17073A), *Slc6a3* (C2; Cat  
757 No. 315441-C2, Lot: 17044A), *Lhx9* (C3; Cat No. 495431-C3, Lot: 17044A), and *Ldb2* (C3; Cat  
758 No. 466061-C3, Lot: 17044A). The RNAscope Fluorescent Multiplex Detection kit (Cat No.  
759 320851) and the associated protocol provided by the manufacturer were used. Briefly, frozen  
760 tissues were removed from -80°C and equilibrated at room temperature for 5 minutes. Slides  
761 were then washed at room temperature in 1x PBS for 3 minutes with agitation. Slides were then  
762 immediately washed in 100% ethanol by moving the slides up and down 5-10 times. The slides

763 were then allowed to dry at room temperature and hydrophobic barriers were drawn using a  
764 hydrophobic pen (ImmEdge Hydrophobic Barrier PAP Pen, Vector Laboratories, Cat. # H-4000)  
765 around the tissue sections. The hydrophobic barrier was allowed to dry overnight. After drying,  
766 the tissue sections were treated with RNAscope Protease IV at room temperature for 30 minutes  
767 and then slides were washed in 1x PBS. Approximately 100 uL of multiplex probe mixtures (C1  
768 - *Th*, C2 - *Slc6a3*, and C3 - one of *Lhx9* or *Ldb2*) containing either approximately 96 uL C1: 2 uL  
769 C2: 2 uL C3 (*Th:Slc6a3:Lhx9*) or 96 uL C1: 0.6 uL C2: 2 uL C3 (*Th:Slc6a3:Ldb2*) were applied  
770 to appropriate sections. Both mixtures provided adequate *in situ* signals. Sections were then  
771 incubated at 40°C for 2 hours in the ACD HybEZ oven. Sections were then sequentially treated  
772 with the RNAscope Multiplex Fluorescent Detection Reagents kit solutions AMP 1-FL, AMP 2-  
773 FL, AMP 3-FL, and AMP 4 Alt B-FL, with washing in between each incubation, according to  
774 manufacturer's recommendations. Sections were then treated with DAPI provided with the  
775 RNAscope Multiplex Fluorescent Detection Reagents kit. One drop of Prolong Gold Antifade  
776 Mountant (Invitrogen, Cat # P36930) was then applied to each section and a coverslip was then  
777 placed on the slide. The slides were then stored in the dark at 4°C overnight before imaging.  
778 Slides were further stored at 4°C throughout imaging. Manufacturer provided positive and  
779 negative controls were also performed alongside experimental probe mixtures according to  
780 manufacturer's protocols. Four sections that encompassed relevant populations in the P7 ventral  
781 MB (SN, VTA, etc.) were chosen for each combination of RNAscope smFISH probes and  
782 subsequent analyses.

783

784 **smFISH Confocal Microscopy.**

785 RNAscope fluorescent *in situ* experiments were analyzed using the Nikon A1 confocal system  
786 equipped with a Nikon Eclipse Ti inverted microscope running Nikon NIS-Elements AR 4.10.01  
787 64-bit software. Images were captured using a Nikon Plan Apo  $\lambda$  60x/1.40 oil immersion lens  
788 with a common pinhole size of 19.2  $\mu$ M, a pixel dwell of 28.8  $\mu$ s, and a pixel resolution of 1024  
789 x 1024. DAPI, FITC, Cy3, and Cy5 channels were used to acquire RNAscope fluorescence.  
790 Positive and negative control slides using probe sets provided by the manufacturer were used in  
791 order to calibrate laser power, offset, and detector sensitivity, for all channels in all experiments  
792 performed.

793

#### 794 **smFISH image analysis and processing.**

795 Confocal images were saved as .nd2 files. Images were then processed in ImageJ as follows.  
796 First, the .nd2 files were imported into ImageJ and images were rotated in order to reflect a  
797 ventral MB orientation with the ventral side of the tissue at the bottom edge. Next the LUT  
798 ranges were adjusted for the FITC (range: 0-2500), Cy3 (range: 0-2500), and Cy5 (range: 0-  
799 1500) channels. All analyzed images were set to the same LUT ranges. Next, the channels were  
800 split and merged back together to produce a “composite” image seen in Figure 2. Scale bars were  
801 then added. Cells of interest were then demarcated, duplicated, and the channels were split.  
802 These cells of interest were then displayed as the insets seen in Figure 2.

803

#### 804 **Immunohistochemistry and quantification of *Th* striatum staining in *Cplx1* mice.**

805 Mice (N=8 *Cplx1*<sup>-/-</sup>; N=3 WT littermates; ages between 4-7.5 weeks) were euthanized and their  
806 brains fresh-frozen on powdered dry ice. Brains were sectioned at 35  $\mu$ m and sections and  
807 mounted onto Superfrost-plus glass slides (VWR International, Poole, UK). Sections were

808 peroxidase inactivated, and one in every 10 sections was processed immunohistochemically for  
809 tyrosine hydroxylase. Sections were incubated in primary anti-tyrosine hydroxylase antibody  
810 (AB152, Millipore) used at 1/2000 dilution in 1% normal goat serum in phosphate-buffered  
811 saline and 0.2% Triton X-100 overnight at 4°C. Antigens were visualised using a horseradish  
812 peroxidase-conjugated anti-rabbit second antibody (Vector, PI-1000, 1/2000 dilution) and  
813 visualized using diaminobenzidine (DAB; Sigma). The slides were stored in the dark (in black  
814 slide boxes) at room temperature (21 C).

815 Images of stained striatum were taken using a Nikon AZ100 microscope equipped with a 2x lens  
816 (Nikon AZ Plan Fluor, NA 0.2, WD45), a Nikon DS-Fi2 camera, and NIS-Elements AR 4.5  
817 software. Appropriate zoom and light exposure were determined before imaging and kept  
818 constant for all slides and sections. Density of Th+ DAB staining was measured using ImageJ  
819 software. Briefly, images were imported into ImageJ and the background was subtracted (default  
820 50 pixels with “light background” selected). Next, images were converted to 8-bit and the image  
821 was inverted. Five measurements of density were taken for each side of a striatum in a section  
822 along with a density measurement from adjacent, unstained cortex. Striosomes were avoided  
823 during measuring when possible. Striatal measurements had background (defined as staining in  
824 the adjacent cortex in a section) subtracted. The mean section measurements (intensity/pixels  
825 squared) for each brain were calculated and represented independent measurements of the same  
826 brain. Variances were compared between the WT and KO populations. A two sample t-test was  
827 then used to compare WT vs. *Cplx1* *-/-* section densities with the following parameters in R  
828 using the “t.test” function: alternative = “two-sided”, var.equal = “T”.

829

830 **ACKNOWLEDGEMENTS**

831 The authors wish to thank Stephen M. Brown for implementation and optimization of smFISH.  
832 Dr. Zhiguang Zheng and Mrs. Wendy Leavens for excellent technical support with the *Cplx1*  
833 knockout mice and immunohistochemistry and Drs Kerstin Reim and Niels Brose for the gift of  
834 the founder mice for the Cambridge Cplx1 knockout mice colony. This research was supported  
835 in part by US National Institutes of Health grants R01 NS62972 and MH106522 to ASM and a  
836 grant from CHDI *Inc.* to AJM.

837

### 838 **AUTHOR CONTRIBUTIONS**

839 PWH, ASM, and LAG designed the study and wrote the paper. PWH, SAM, WDL, GAC, and  
840 AJM performed the experiments. PWH and LAG implemented the computational algorithms to  
841 process the raw data and conduct analyses thereof. PWH, LAG, and ASM analyzed and  
842 interpreted the resulting data. LAG contributed novel computational pipeline development.  
843 Correspondence to ASM ([andy@jhmi.edu](mailto:andy@jhmi.edu)) and LAG ([loyalgoff@jhmi.edu](mailto:loyalgoff@jhmi.edu)).

844

### 845 **FINANCIAL INTERESTS STATEMENT**

846 The authors declare no competing financial interests.

847

848 **REFERENCES**

- 849 1. Visscher, P. M., Brown, M. A., McCarthy, M. I. & Yang, J. Five Years of GWAS  
850 Discovery. *Am. J. Hum. Genet.* **90**, 7–24 (2012).
- 851 2. Maurano, M. T. *et al.* Systematic Localization of Common Disease-Associated Variation  
852 in Regulatory DNA. *Science (80-. )*. **337**, 1190–1195 (2012).
- 853 3. Farh, K. K. *et al.* Genetic and epigenetic fine mapping of causal autoimmune disease  
854 variants. *Nature* **518**, 337–343 (2015).
- 855 4. Smemo, S. *et al.* Obesity-associated variants within FTO form long-range functional  
856 connections with IRX3. (2014). doi:10.1038/nature13138
- 857 5. Gupta, R. M. *et al.* A Genetic Variant Associated with Five Vascular Diseases Is a Distal  
858 Regulator of Endothelin-1 Gene Expression In Brief A common sequence variant that  
859 perturbs long-range enhancer interactions mediates risk for different vascular diseases. A  
860 Genetic Variant Associated with Five Vascular Diseases Is a Distal Regulator of  
861 Endothelin-1 Gene Expression. *Cell* **170**, 522–533 (2017).
- 862 6. Lee, D. *et al.* A method to predict the impact of regulatory variants from DNA sequence.  
863 *Nat. Genet.* **47**, 955–61 (2015).
- 864 7. Boyle, E. A., Li, Y. I. & Pritchard, J. K. An Expanded View of Complex Traits: From  
865 Polygenic to Omnigenic. *Cell* **169**, 1177–1186 (2017).
- 866 8. de Rijk, M. C. *et al.* Prevalence of parkinsonism and Parkinson’s disease in Europe: the  
867 EUROPARKINSON Collaborative Study. European Community Concerted Action on the  
868 Epidemiology of Parkinson’s disease. *J Neurol Neurosurg Psychiatry* **62**, 10–15 (1997).
- 869 9. Pringsheim, T., Jette, N., Frolkis, A. & Steeves, T. D. The prevalence of Parkinson’s  
870 disease: a systematic review and meta-analysis. *Mov Disord* **29**, 1583–1590 (2014).

- 871 10. Savitt, J. M., Dawson, V. L. & Dawson, T. M. Diagnosis and treatment of Parkinson  
872 disease: molecules to medicine. *J Clin Invest* **116**, 1744–1754 (2006).
- 873 11. Nalls, M. a *et al.* Large-scale meta-analysis of genome-wide association data identifies six  
874 new risk loci for Parkinson’s disease. *Nat. Genet.* **56**, 1–7 (2014).
- 875 12. Puschmann, A. Monogenic Parkinson’s disease and parkinsonism: clinical phenotypes and  
876 frequencies of known mutations. *Park. Relat Disord* **19**, 407–415 (2013).
- 877 13. Klein, C. & Westenberger, A. Genetics of Parkinson’s disease. *Cold Spring Harb*  
878 *Perspect Med* **2**, a008888 (2012).
- 879 14. Heintz, N. Gene Expression Nervous System Atlas (GENSAT). *Nat. Neurosci.* **7**, 483–483  
880 (2004).
- 881 15. Barallobre, M. J. *et al.* DYRK1A promotes dopaminergic neuron survival in the  
882 developing brain and in a mouse model of Parkinson’s disease. *Cell Death Dis.* **5**, e1289  
883 (2014).
- 884 16. Qiu, X. *et al.* Single-cell mRNA quantification and differential analysis with Census. *Nat*  
885 *Methods* **14**, 309–315 (2017).
- 886 17. Qiu, X. *et al.* Reversed graph embedding resolves complex single-cell trajectories. *Nat.*  
887 *Methods* (2017). doi:10.1038/nmeth.4402
- 888 18. Van Der Maaten, L. & Hinton, G. Visualizing Data using t-SNE. *J. Mach. Learn. Res.* **9**,  
889 2579–2605 (2008).
- 890 19. Arenas, E., Denham, M. & Villaescusa, J. C. How to make a midbrain dopaminergic  
891 neuron. *Development* **142**, 1918–36 (2015).
- 892 20. Björklund, A. & Dunnett, S. B. Dopamine neuron systems in the brain: an update. *Trends*  
893 *Neurosci* **30**, 194–202 (2007).



- 894 21. Li, H., Zeitler, P. S., Valerius, M. T., Small, K. & Potter, S. S. Gsh-1, an orphan Hox  
895 gene, is required for normal pituitary development. *EMBO J* **15**, 714–724 (1996).
- 896 22. McNay, D. E., Pelling, M., Claxton, S., Guillemot, F. & Ang, S. L. Mash1 is required for  
897 generic and subtype differentiation of hypothalamic neuroendocrine cells. *Mol Endocrinol*  
898 **20**, 1623–1632 (2006).
- 899 23. Campbell, J. N. *et al.* A molecular census of arcuate hypothalamus and median eminence  
900 cell types. *Nat Neurosci* **20**, 484–496 (2017).
- 901 24. Agoston, Z. *et al.* Meis2 is a Pax6 co-factor in neurogenesis and dopaminergic  
902 periglomerular fate specification in the adult olfactory bulb. *Development* **141**, 28–38  
903 (2014).
- 904 25. Francis, F. *et al.* Doublecortin is a developmentally regulated, microtubule-associated  
905 protein expressed in migrating and differentiating neurons. *Neuron* **23**, 247–256 (1999).
- 906 26. Gokce, O. *et al.* Cellular Taxonomy of the Mouse Striatum as Revealed by Single-Cell  
907 RNA-Seq. *Cell Rep.* **16**, 1126–1137 (2016).
- 908 27. Vergaño-Vera, E. *et al.* Nurr1 blocks the mitogenic effect of FGF-2 and EGF, inducing  
909 olfactory bulb neural stem cells to adopt dopaminergic and dopaminergic-GABAergic  
910 neuronal phenotypes. *Dev Neurobiol* **75**, 823–841 (2015).
- 911 28. Panman, L. *et al.* Sox6 and Otx2 control the specification of substantia nigra and ventral  
912 tegmental area dopamine neurons. *Cell Rep.* **8**, 1018–1025 (2014).
- 913 29. Viereckel, T. *et al.* Midbrain Gene Screening Identifies a New Mesoaccumbal  
914 Glutamatergic Pathway and a Marker for Dopamine Cells Neuroprotected in Parkinson’s  
915 Disease. *Sci Rep* **6**, 35203 (2016).
- 916 30. Kozicz, T., Vigh, S. & Arimura, A. The source of origin of PACAP- and VIP-

- 917 immunoreactive fibers in the laterodorsal division of the bed nucleus of the stria terminalis  
918 in the rat. *Brain Res.* **810**, 211–219 (1998).
- 919 31. Darland, T., Heinricher, M. M. & Grandy, D. K. Orphanin FQ/nociceptin: A role in pain  
920 and analgesia, but so much more. *Trends in Neurosciences* **21**, 215–221 (1998).
- 921 32. Cai, H., Liu, G., Sun, L. & Ding, J. Aldehyde Dehydrogenase 1 making molecular inroads  
922 into the differential vulnerability of nigrostriatal dopaminergic neuron subtypes in  
923 Parkinson’s disease. *Transl. Neurodegener.* **3**, 27 (2014).
- 924 33. La Manno, G. *et al.* Molecular Diversity of Midbrain Development in Mouse, Human, and  
925 Stem Cells. *Cell* **167**, 566–580.e19 (2016).
- 926 34. Itoh, N. & Ohta, H. Roles of FGF20 in dopaminergic neurons and Parkinson’s disease.  
927 *Front Mol Neurosci* **6**, 15 (2013).
- 928 35. Poulin, J. F. *et al.* Defining midbrain dopaminergic neuron diversity by single-cell gene  
929 expression profiling. *Cell Rep.* **9**, 930–943 (2014).
- 930 36. Uhde, C. W., Vives, J., Jaeger, I. & Li, M. Rmst is a novel marker for the mouse ventral  
931 mesencephalic floor plate and the anterior dorsal midline cells. *PLoS One* **5**, (2010).
- 932 37. Ng, S. Y., Bogu, G. K., Soh, B. & Stanton, L. W. The long noncoding RNA RMST  
933 interacts with SOX2 to regulate neurogenesis. *Mol. Cell* **51**, 349–359 (2013).
- 934 38. Ellis, B. C., Molloy, P. L. & Graham, L. D. CRNDE: A long non-coding RNA involved in  
935 CanceR Neurobiology, and DEvelopment. *Frontiers in Genetics* **3**, 1–15 (2012).
- 936 39. Lin, M. *et al.* RNA-Seq of human neurons derived from iPS cells reveals candidate long  
937 non-coding RNAs involved in neurogenesis and neuropsychiatric disorders. *PLoS One* **6**,  
938 (2011).
- 939 40. Guttman, M. *et al.* lincRNAs act in the circuitry controlling pluripotency and

- 940 differentiation. (2011). doi:10.1038/nature10398
- 941 41. Morales, M. & Margolis, E. B. Ventral tegmental area: cellular heterogeneity,  
942 connectivity and behaviour. *Nat Rev Neurosci* **18**, 73–85 (2017).
- 943 42. Everitt, B. J., Hökfelt, T., Wu, J. Y. & Goldstein, M. Coexistence of tyrosine hydroxylase-  
944 like and gamma-aminobutyric acid-like immunoreactivities in neurons of the arcuate  
945 nucleus. *Neuroendocrinology* **39**, 189–191 (1984).
- 946 43. Asmus, S. E. *et al.* Increasing proportions of tyrosine hydroxylase-immunoreactive  
947 interneurons colocalize with choline acetyltransferase or vasoactive intestinal peptide in  
948 the developing rat cerebral cortex. *Brain Res* **1383**, 108–119 (2011).
- 949 44. Langfelder, P. & Horvath, S. WGCNA: an R package for weighted correlation network  
950 analysis. *BMC Bioinformatics* **9**, 559 (2008).
- 951 45. Langfelder, P. & Horvath, S. Fast R Functions for Robust Correlations and Hierarchical  
952 Clustering. *J Stat Softw* **46**, (2012).
- 953 46. Pascoli, V., Terrier, J., Hiver, A. & Lüscher, C. Sufficiency of Mesolimbic Dopamine  
954 Neuron Stimulation for the Progression to Addiction. *Neuron* **88**, 1054–1066 (2015).
- 955 47. Dekker, J., Marti-Renom, M. A. & Mirny, L. A. Exploring the three-dimensional  
956 organization of genomes: interpreting chromatin interaction data. *Nat. Rev. Genet.* **14**,  
957 390–403 (2013).
- 958 48. Dixon, J. R. *et al.* Topological domains in mammalian genomes identified by analysis of  
959 chromatin interactions. *Nature* **485**, 376–380 (2012).
- 960 49. Lettice, L. A. *et al.* A long-range Shh enhancer regulates expression in the developing  
961 limb and fin and is associated with preaxial polydactyly. *Hum. Mol. Genet.* **12**, 1725–1735  
962 (2003).

- 963 50. Benko, S. *et al.* Highly conserved non-coding elements on either side of SOX9 associated  
964 with Pierre Robin sequence. *Nat. Genet.* **41**, 359–364 (2009).
- 965 51. Yong, V. W., Power, C., Forsyth, P. & Edwards, D. R. Metalloproteinases in biology and  
966 pathology of the nervous system. *Nat Rev Neurosci* **2**, 502–511 (2001).
- 967 52. Li, Z., Wu, Y. & Baraban, J. M. The Translin/Trax RNA binding complex: clues to  
968 function in the nervous system. *Biochim Biophys Acta* **1779**, 479–485 (2008).
- 969 53. Doan, R. N. *et al.* Mutations in Human Accelerated Regions Disrupt Cognition and Social  
970 Behavior. *Cell* **167**, 341–354.e12 (2016).
- 971 54. Lek, M. *et al.* Analysis of protein-coding genetic variation in 60,706 humans. *Nature* **536**,  
972 285–291 (2016).
- 973 55. Basso, M. *et al.* Proteome analysis of human substantia nigra in Parkinson’s disease.  
974 *Proteomics* **4**, 3943–3952 (2004).
- 975 56. Gispert, S. *et al.* Complexin-1 and Foxp1 Expression Changes Are Novel Brain Effects of  
976 Alpha-Synuclein Pathology. *Mol. Neurobiol.* **52**, 57–63 (2015).
- 977 57. Glynn, D., Drew, C. J., Reim, K., Brose, N. & Morton, A. J. Profound ataxia in complexin  
978 I knockout mice masks a complex phenotype that includes exploratory and habituation  
979 deficits. *Hum. Mol. Genet.* **14**, 2369–2385 (2005).
- 980 58. Glynn, D., Sizemore, R. J. & Morton, A. J. Early motor development is abnormal in  
981 complexin 1 knockout mice. *Neurobiol. Dis.* **25**, 483–495 (2007).
- 982 59. Kielar, C., Sawiak, S. J., Negredo, P. N., Tse, D. H. Y. & Morton, A. J. Tensor-based  
983 morphometry and stereology reveal brain pathology in the complexin1 knockout mouse.  
984 *PLoS One* **7**, (2012).
- 985 60. Parent, M. & Parent, A. Substantia nigra and Parkinson’s disease: a brief history of their

- 986 long and intimate relationship. *Can J Neurol Sci* **37**, 313–319 (2010).
- 987 61. Lahut, S. *et al.* Blood RNA biomarkers in prodromal PARK4 and REM sleep behavior  
988 disorder show role of complexin-1 loss for risk of Parkinson’s disease. *Dis. Model. Mech.*  
989 *dmm.028035* (2017). doi:10.1242/dmm.028035
- 990 62. Hildick-Smith, G. J. *et al.* Macrocytic anemia and mitochondriopathy resulting from a  
991 defect in sideroflexin 4. *Am. J. Hum. Genet.* **93**, 906–914 (2013).
- 992 63. Islam, M. M., Suzuki, H., Makoto, Y. & Tanaka, M. Primary structure of the smallest  
993 (6.4-kDa) subunit of human and bovine ubiquinol-cytochrome c reductase deduced from  
994 cDNA sequences. *Biochem Mol Biol Int.* **41**, 1109–1116 (1997).
- 995 64. Swartz, D. A., Park, E. I., Visek, W. J. & Kaput, J. The e subunit gene of murine F1F0-  
996 ATP synthase. Genomic sequence, chromosomal mapping, and diet regulation. *J. Biol.*  
997 *Chem.* **271**, 20942–20948 (1996).
- 998 65. Tomar, D. *et al.* MCUR1 Is a Scaffold Factor for the MCU Complex Function and  
999 Promotes Mitochondrial Bioenergetics. *Cell Rep.* **15**, 1673–1685 (2016).
- 1000 66. Plovanich, M. *et al.* MICU2, a Paralog of MICU1, Resides within the Mitochondrial  
1001 Uniporter Complex to Regulate Calcium Handling. *PLoS One* **8**, (2013).
- 1002 67. Wonsey, D. R., Zeller, K. I. & Dang, C. V. The c-Myc target gene PRDX3 is required for  
1003 mitochondrial homeostasis and neoplastic transformation. *Proc. Natl. Acad. Sci. U. S. A.*  
1004 **99**, 6649–54 (2002).
- 1005 68. Curran, J. E. *et al.* Genetic variation in PARL influences mitochondrial content. *Hum.*  
1006 *Genet.* **127**, 183–190 (2010).
- 1007 69. Winklhofer, K. F. & Haass, C. Mitochondrial dysfunction in Parkinson’s disease. *Biochim*  
1008 *Biophys Acta* **1802**, 29–44 (2010).

- 1009 70. Shi, G. *et al.* Functional alteration of PARL contributes to mitochondrial dysregulation in  
1010 Parkinson's disease. *Hum. Mol. Genet.* **20**, 1966–1974 (2011).
- 1011 71. Shi, G. & McQuibban, G. A. The Mitochondrial Rhomboid Protease PARL Is Regulated  
1012 by PDK2 to Integrate Mitochondrial Quality Control and Metabolism. *Cell Rep.* **18**, 1458–  
1013 1472 (2017).
- 1014 72. Jin, S. M. *et al.* Mitochondrial membrane potential regulates PINK1 import and  
1015 proteolytic destabilization by PARL. *J. Cell Biol.* **191**, 933–942 (2010).
- 1016 73. Galter, D. *et al.* LRRK2 expression linked to dopamine-innervated areas. *Ann Neurol* **59**,  
1017 714–719 (2006).
- 1018 74. Higashi, S. *et al.* Expression and localization of Parkinson's disease-associated leucine-  
1019 rich repeat kinase 2 in the mouse brain. *J Neurochem* **100**, 368–381 (2007).
- 1020 75. Soden, M. E. *et al.* Disruption of Dopamine Neuron Activity Pattern Regulation through  
1021 Selective Expression of a Human KCNN3 Mutation. *Neuron* **80**, 997–1009 (2013).
- 1022 76. Abuirmeileh, A., Harkavyi, A., Kingsbury, A., Lever, R. & Whitton, P. S. The CRF-like  
1023 peptide urocortin greatly attenuates loss of extracellular striatal dopamine in rat models of  
1024 Parkinson's disease by activating CRF1 receptors. *Eur. J. Pharmacol.* **604**, 45–50 (2009).
- 1025 77. Simunovic, F. *et al.* Gene expression profiling of substantia nigra dopamine neurons:  
1026 further insights into Parkinson's disease pathology. *Brain* **132**, 1795–1809 (2009).
- 1027 78. Saxena, A. *et al.* Trehalose-enhanced isolation of neuronal sub-types from adult mouse  
1028 brain. *Biotechniques* **52**, 381–385 (2012).
- 1029 79. Picelli, S. *et al.* Full-length RNA-seq from single cells using Smart-seq2. *Nat. Protoc.* **9**,  
1030 171–181 (2014).
- 1031 80. Kim, D., Langmead, B. & Salzberg, S. L. HISAT: a fast spliced aligner with low memory

- 1032 requirements. *Nat. Methods* **12**, 357–60 (2015).
- 1033 81. Mudge, J. M. & Harrow, J. Creating reference gene annotation for the mouse C57BL6/J  
1034 genome assembly. *Mamm Genome* **26**, 366–378 (2015).
- 1035 82. Trapnell, C. *et al.* Differential gene and transcript expression analysis of RNA-seq  
1036 experiments with TopHat and Cufflinks. *Nat. Protoc.* **7**, 562–78 (2012).
- 1037 83. Trapnell, C. *et al.* The dynamics and regulators of cell fate decisions are revealed by  
1038 pseudotemporal ordering of single cells. *Nat. Biotechnol.* **32**, 381–6 (2014).
- 1039 84. Huber, W. *et al.* Orchestrating high-throughput genomic analysis with Bioconductor. *Nat*  
1040 *Methods* **12**, 115–121 (2015).
- 1041 85. Wang, X.-F. & Xu, Y. Fast clustering using adaptive density peak detection. *Stat. Methods*  
1042 *Med. Res.* 1–14 (2015). doi:10.1177/0962280215609948
- 1043 86. Trapnell, C. *et al.* Differential analysis of gene regulation at transcript resolution with  
1044 RNA-seq. *Nat. Biotechnol.* **31**, 46–53 (2013).
- 1045 87. Burns, J. C., Kelly, M. C., Hoa, M., Morell, R. J. & Kelley, M. W. Single-cell RNA-Seq  
1046 resolves cellular complexity in sensory organs from the neonatal inner ear. *Nat Commun*  
1047 **6**, 8557 (2015).
- 1048 88. Molyneaux, B. J. *et al.* DeCoN: Genome-wide analysis of *in vivo* transcriptional dynamics  
1049 during pyramidal neuron fate selection in neocortex. *Neuron* **85**, 275–288 (2015).
- 1050 89. Subramanian, A. *et al.* Gene set enrichment analysis: a knowledge-based approach for  
1051 interpreting genome-wide expression profiles. *Proc Natl Acad Sci U S A* **102**, 15545–  
1052 15550 (2005).
- 1053 90. Mootha, V. K. *et al.* PGC-1 $\alpha$ -responsive genes involved in oxidative phosphorylation  
1054 are coordinately downregulated in human diabetes. *Nat Genet* **34**, 267–273 (2003).

- 1055 91. Yu, G., Wang, L.-G., Han, Y. & He, Q.-Y. clusterProfiler: an R package for comparing  
1056 biological themes among gene clusters. *OMICS* **16**, 284–7 (2012).
- 1057 92. Langfelder, P., Zhang, B. & Horvath, S. Defining clusters from a hierarchical cluster tree:  
1058 the Dynamic Tree Cut package for R. *Bioinformatics* **24**, 719–720 (2008).
- 1059 93. Durinck, S. *et al.* BioMart and Bioconductor: A powerful link between biological  
1060 databases and microarray data analysis. *Bioinformatics* **21**, 3439–3440 (2005).
- 1061 94. Durinck, S., Spellman, P. T., Birney, E. & Huber, W. Mapping identifiers for the  
1062 integration of genomic datasets with the R/Bioconductor package biomaRt. (2009).  
1063 doi:10.1038/nprot.2009.97



1064 FIGURES

1065 Figure 1

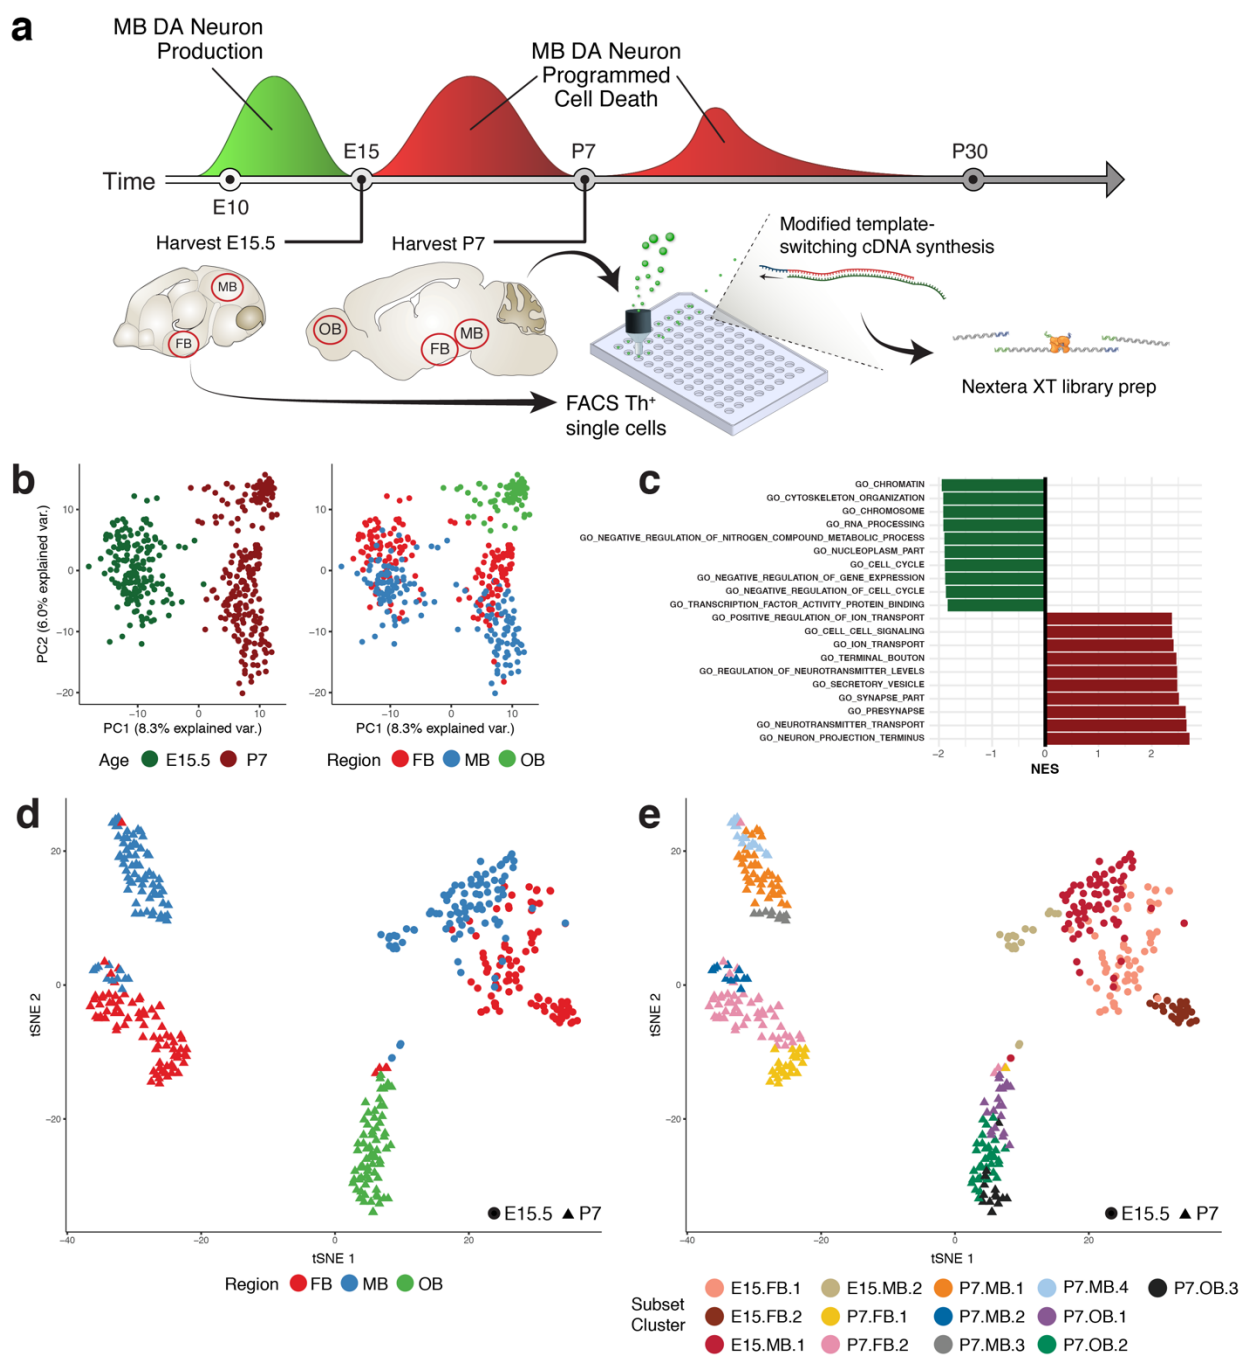

1066  
 1067 Figure 1. scRNA-seq analysis of isolated cells allows their separation by developmental time. a) Diagram of  
 1068 scRNA-seq experimental procedures for isolating and sequencing EGFP+ cells. b) Principal component analysis  
 1069 (PCA) on all cells collected using genes with highly variant transcriptional profiles. The greatest source of variation

1070 (PC1) is explained by the time point at which the cells were collected, not the region from which the cells were  
 1071 collected. c) The top ten Gene Ontology (GO) gene sets enriched in genes with positive (red) and negative (green)  
 1072 PC1 loadings. Genes with negative PC1 loadings and negative normalized enrichment scores (NES) were enriched  
 1073 for terms indicative of mitotically active cells. Genes with positive PC1 loadings and NES scores were enriched for  
 1074 terms expected of more mature neurons. d) A t-distributed Stochastic Neighbor Embedding (t-SNE) plot of all  
 1075 collected cells colored by regional identity. E15.5 cells cluster together while P7 cells cluster primarily by regional  
 1076 identity. e) A t-SNE plot of all collected cells colored by subset cluster identity. Through iterative analysis,  
 1077 timepoint-regions collected can be separated into multiple subpopulations (13 in total). Midbrain, Mb; Forebrain,  
 1078 FB; Olfactory bulb; OB; Fluorescence activated cell sorting; FACS.

1079

1080 **Figure 2**

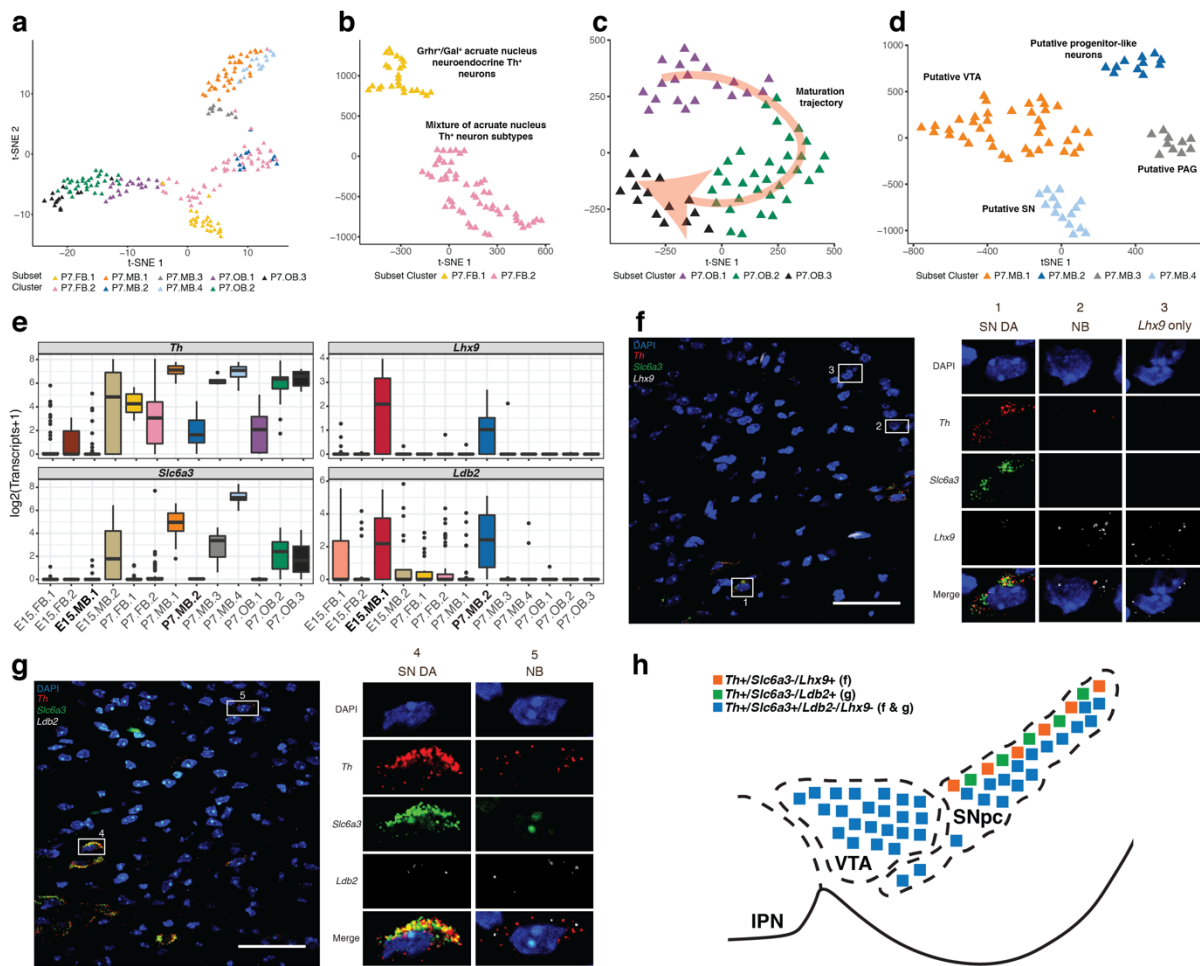

1081

1082 Figure 2. Subclusters of P7 *Th*<sup>+</sup> neurons are identified based on marker gene analyses. a) A t-SNE plot of all P7  
1083 neurons collected using colored by subset cluster identity. The neurons mostly cluster by regional identity. b) t-SNE  
1084 plot of P7 FB neurons. P7 FB neurons cluster into two distinct populations. c) t-SNE plot of P7 OB neurons. P7 OB  
1085 neurons cluster into three populations. These populations represent a trajectory of *Th*<sup>+</sup> OB maturation (Table S3) as  
1086 indicated by the red arrow. d) A t-SNE plot of P7 MB neurons. P7 MB neurons cluster into four clusters: the  
1087 *substantia nigra* (SN), the ventral tegmental area (VTA), the periaqueductal grey area (PAG), and a novel  
1088 progenitor-like population. e) Boxplots displaying the expression of four genes (*Th*, *Slc6a3*, *Lhx9*, and *Ldb2*) across  
1089 all subclusters identified. The novel P7 MB progenitor-like cluster (P7.MB.2) has a similar expression profile to  
1090 E15.5 MB neuroblast population (E15.MB.1) (Table S2). +/- 1.5x interquartile range is represented by the whiskers  
1091 on the boxplots. Data points beyond 1.5x interquartile range are considered as outliers and plotted as black points. f)  
1092 Representative image of multiplex single molecule fluorescent *in situ* hybridization (smFISH) for *Th*, *Slc6a3*, and  
1093 *Lhx9*, in the mouse ventral midbrain. Zoomed-in panels represent cell populations observed. Scale bar, 50  $\mu$ M. g)  
1094 Representative image of multiplex smFISH for *Th*, *Slc6a3*, and *Ldb2*, in the mouse ventral midbrain. Zoomed-in  
1095 panels represent cell populations observed. h) Diagram of ventral midbrain summarizing the results of smFISH.  
1096 *Th*<sup>+</sup>/*Slc6a3*<sup>-</sup>/*Lhx9*<sup>+</sup> and *Th*<sup>+</sup>/*Slc6a3*<sup>-</sup>/*Ldb2*<sup>+</sup> cells are both found in the dorsal SN. Scale bar, 50  $\mu$ M. NB,  
1097 neuroblast; SN, substantia nigra; VTA, ventral tegmental area; IPN, interpeduncular nucleus.  
1098

1099 **Figure 3**  
1100

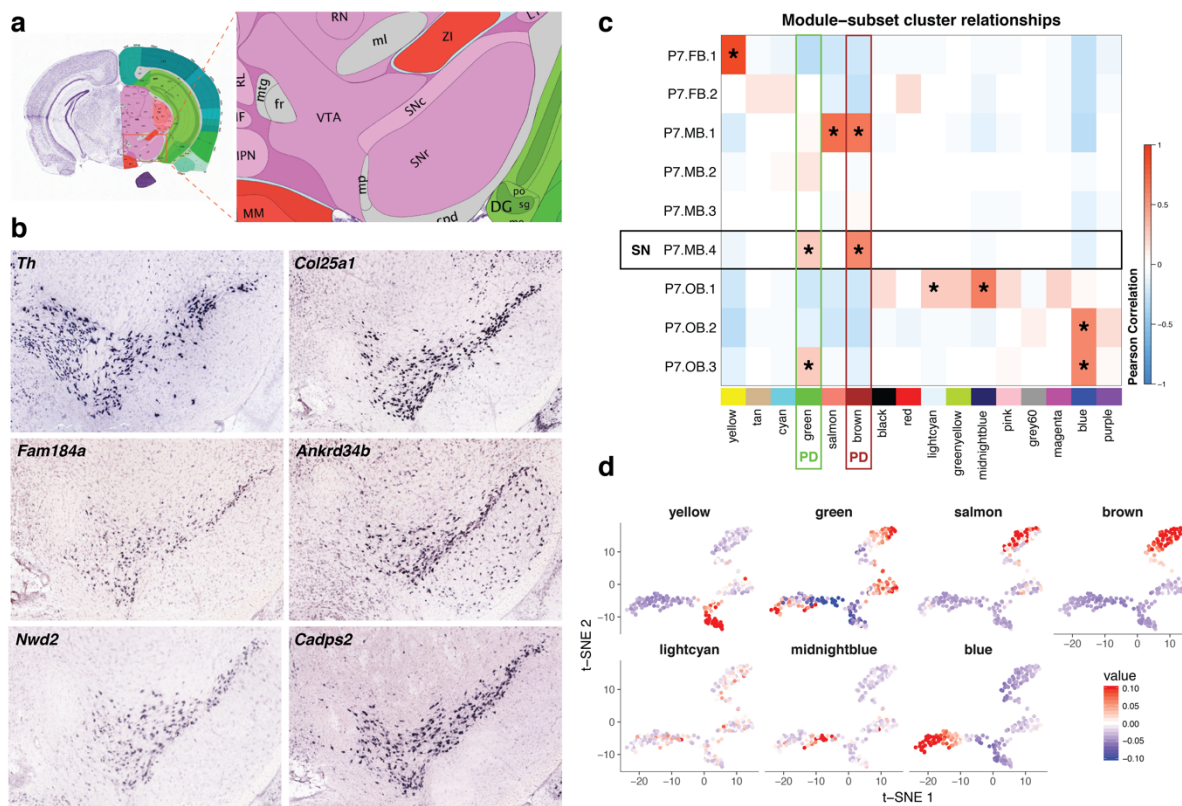

1101  
1102 Figure 3. Novel markers and gene modules reveal context specific SN DA biology. a) Reference atlas diagram from  
1103 the Allen Brain Atlas (ABA; <http://www.brain-map.org/>) of the P56 mouse ventral midbrain. b) Confirmation of  
1104 novel SN DA neuron marker genes through the use of ABA *in situ* hybridization data (<http://www.brain-map.org/>).  
1105 Coronal, P56 mouse *in situ* data was explored in order to confirm the expression of 25 novel SN markers.  
1106 *Th* expression in P56 mice was used as an anatomical reference during analysis. c) Correlation heatmap of the  
1107 Pearson correlation between module eigengenes and P7 *Th*<sup>+</sup> subset cluster identity. Modules are represented by  
1108 their assigned colors at the bottom of the matrix. Modules that had a positive correlation with a subset cluster and  
1109 had a correlation P-value less than the Bonferroni corrected significance level (P-value < 3.5e-04) contain an  
1110 asterisk. SN cluster (P7.MB.4) identity, denoted by a black rectangle, was found to be highly correlated with two  
1111 modules (“green” and “brown”) that were enriched for the “Parkinson’s Disease” KEGG gene set (labeled with  
1112 “PD”). d) The eigengene value for each P7 neuron in the seven WGCNA modules shown to be significantly  
1113 positively associated with a subset cluster overlaid on the t-SNE plot of all P7 neurons (Figure 2a). Plotting of

1114 eigengenes confirms strict spatial restriction of module association. Only the “lightcyan” module does not seem to

1115 show robust spatial restriction.

1116

1117 **Figure 4**

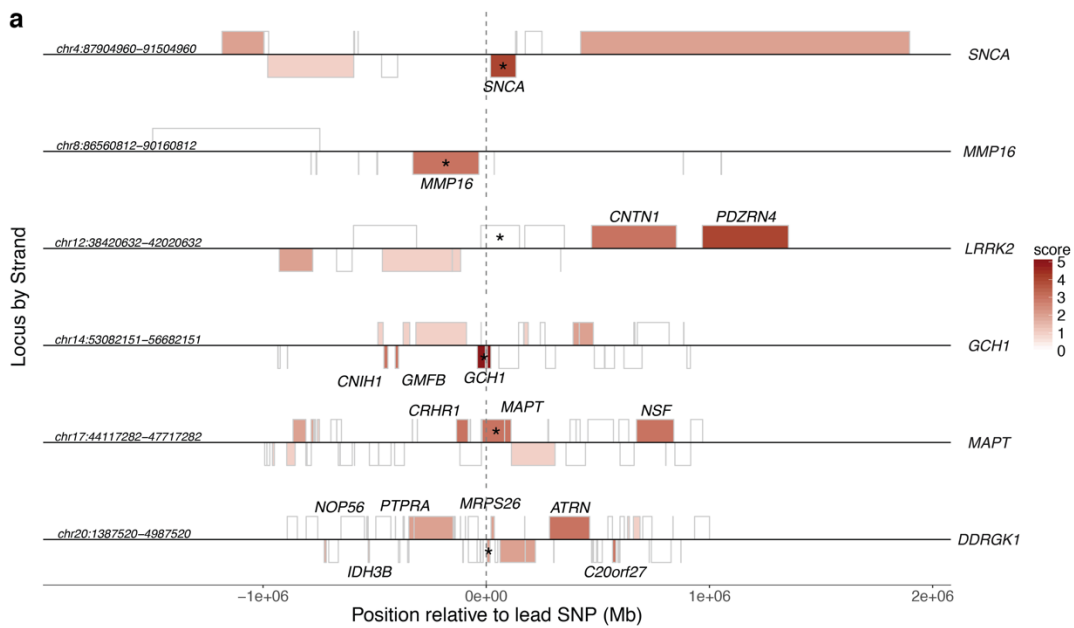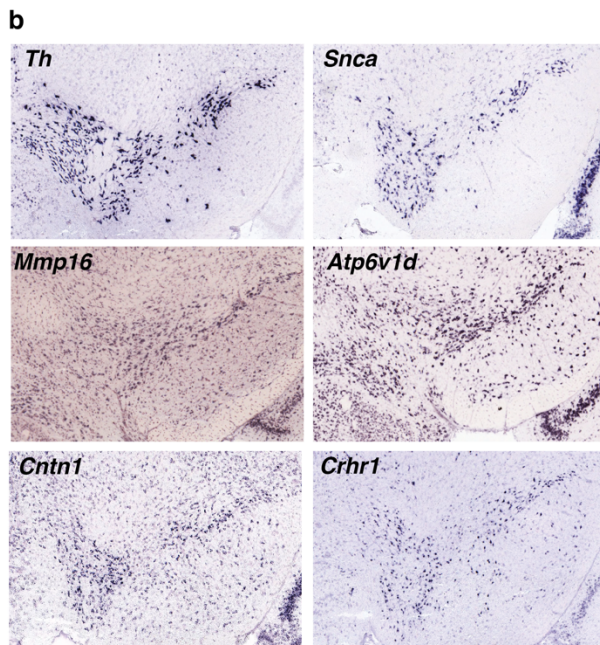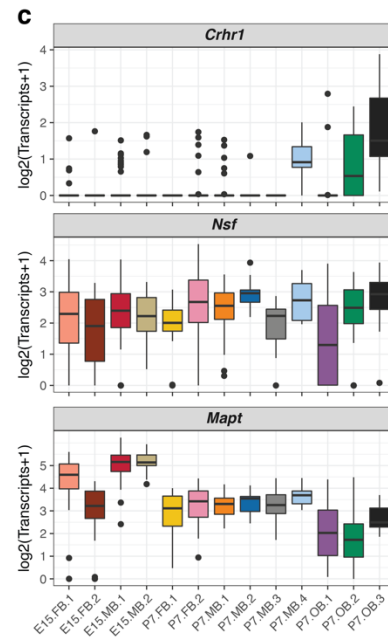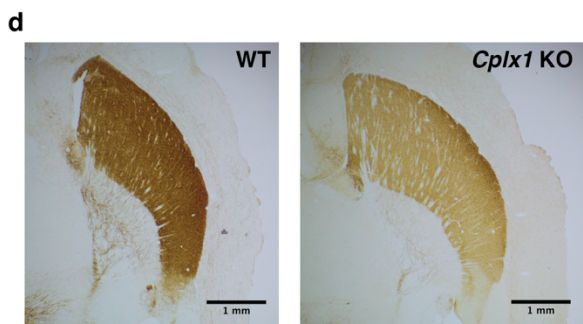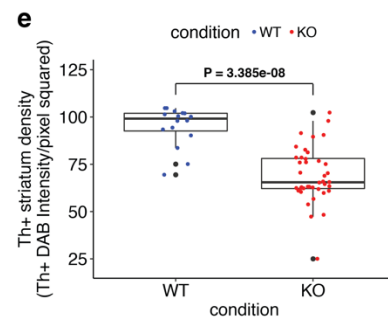

1119 Figure 4. Context specific SN DA data allows for the prioritization of candidate genes in PD GWAS loci. a) A locus  
1120 plot displaying four megabase regions in the human genome (hg38) centered on PD GWAS SNPs in six loci. Genes  
1121 are displayed as boxes on their appropriate strand. Genes are shaded by their prioritization score and gene names are  
1122 displayed for genes with a score of 3 or higher in each locus. b) *In situ* hybridization from the ABA  
1123 (<http://www.brain-map.org/>) of five prioritized genes along with *Th* for an anatomical reference. Coronal, P56  
1124 mouse *in situ* data was used. c) Boxplots displaying expression of prioritized genes from the *MAPT* locus (Figure 4a;  
1125 Table 1). +/- 1.5x interquartile range is represented by the whiskers on the boxplots. Data points beyond 1.5x  
1126 interquartile range are considered as outliers and plotted as black points. d) Representative light microscopy images  
1127 of *Th*<sup>+</sup> innervation density in the striatum of WT and *Cplx1* knockout (KO) mice. Scale bar, 1 mm. e) Boxplots  
1128 comparing the level of *Th*<sup>+</sup> striatum innervation between WT and *Cplx1* KO mice. DAB staining density was  
1129 measured in 35  $\mu$ M, horizontal sections in WT mice (mice = 3, sections = 16) and *Cplx1* KO mice (mice = 8,  
1130 sections = 40). Each point in the boxplot represents a stained, 35  $\mu$ M section. Statistical analyses were performed  
1131 between conditions with section averages in order to preserve observed variability (WT n = 16, *Cplx1* KO n = 40).  
1132 A two sample t-test revealed that *Th*<sup>+</sup> innervation density was significantly lower in *Cplx1* KO mice ( $t = 6.4395$ ,  $df$   
1133 = 54,  $p = 3.386e-08$ ). Data points outside of 1.5x interquartile range, represented by the whiskers on the boxplots,  
1134 are considered as outliers and plotted as black points.

1135  
1136

1137  
1138

1139

1140

1141

1142

1143

1144

1145

1146 TABLES

1147 Table 1. Summary of the systematic scoring of genes in 32 GWAS loci associated with PD

| Locus          | Genes | Mouse Homologs | Expressed Genes | Top Candidate Genes                         | Prioritized by                                                    | Closest Gene Expressed                           |
|----------------|-------|----------------|-----------------|---------------------------------------------|-------------------------------------------------------------------|--------------------------------------------------|
| ACMSD-TMEM163  | 17    | 9              | 5               | <i>UBXN4; CCNT2; R3HDM1; RAB3GAP1</i>       | SN expression; pLI                                                | No, neither                                      |
| BCKDK-STX1B    | 90    | 54             | 19              | <i>MAPK3; VKORC1; BOLA2B</i>                | SN expression; Differential expression; pLI                       | Yes, both                                        |
| BST1           | 19    | 10             | 3               | <i>CPEB2</i>                                | SN expression; Differential expression                            | No                                               |
| CCDC62         | 50    | 41             | 17              | <i>ARL6IP4</i>                              | SN expression; Differential expression                            | No                                               |
| DDRGK1         | 54    | 37             | 13              | <i>ATRN; NOP56; MRPS26; C20orf27; IDH3B</i> | SN expression; Differential expression; pLI                       | Yes                                              |
| DLG2           | 15    | 7              | 4               | <i>DLG2; CCDC90B</i>                        | SN expression; Differential expression; pLI                       | Yes                                              |
| FAM47E-SCARB2  | 33    | 22             | 10              | <i>G3BP2; CCNI; CDKL2</i>                   | SN expression; Differential expression; pLI                       | Yes - <i>SCARB2</i> , No - <i>FAM47E</i>         |
| FGF20          | 18    | 12             | 8               | <i>FGF20; ZDHHC2; TUSC3; MICU3; MTMR7</i>   | SN expression; Differential expression; SN specific; pLI          | Yes                                              |
| GBA-SYT11      | 84    | 56             | 36              | <i>KCNN3</i>                                | SN expression; Differential expression; SN specific; WGCNA module | Yes, both                                        |
| GCH1           | 29    | 15             | 7               | <i>GCH1</i>                                 | SN expression; Differential expression; SN specific; WGCNA module | Yes                                              |
| GPNUMB         | 28    | 13             | 5               | <i>RAPGEF5</i>                              | SN expression; Differential expression                            | No                                               |
| HLA-DBQ1       | 164   | 99             | 31              | <i>ATP6V1G2</i>                             | SN expression; Differential expression; WGCNA module              | No                                               |
| INPP5F         | 29    | 13             | 7               | <i>PRDX3; NANOS1; INPP5F; SFXN4</i>         | SN expression; Differential expression; pLI                       | Yes                                              |
| ITGA8          | 27    | 15             | 5               | <i>FAM171A1</i>                             | SN expression; Differential expression                            | No                                               |
| KRT8P25-APOOP2 | 17    | 7              | 2               | <i>CHMP2B</i>                               | SN expression; Differential expression                            | No, neither are in mouse                         |
| LRRK2          | 10    | 7              | 4               | <i>PDZRN4</i>                               | SN expression; Differential expression; WGCNA module              | No                                               |
| MAPT           | 40    | 20             | 8               | <i>CRHR1; NSF; MAPT</i>                     | SN expression; Differential expression; pLI                       | Yes                                              |
| MCCC1          | 25    | 11             | 5               | <i>DCUN1D1; ABCC5; PARL</i>                 | SN expression; Differential expression; pLI                       | No                                               |
| MIR4697        | 14    | 11             | 6               | <i>OPCML</i>                                | SN expression; Differential expression                            | Not in mouse                                     |
| MMP16          | 9     | 2              | 1               | <i>MMP16</i>                                | SN expression                                                     | Yes                                              |
| NMD3           | 20    | 10             | 3               | <i>B3GALNT1</i>                             | SN expression; Differential expression                            | Yes                                              |
| RAB7L1-NUCKS1  | 42    | 31             | 11              | <i>LRRN2; KLHDC8A; SRGAP2</i>               | SN expression; Differential expression; pLI                       | Yes - <i>NUCKS1</i> , No - <i>RAB7L1 (Rab29)</i> |
| RIT2           | 6     | 3              | 3               | <i>RIT2; SYT4</i>                           | SN expression; Differential expression; pLI                       | Yes                                              |
| SIPA1L2        | 15    | 6              | 1               | <i>TSNAX</i>                                | SN expression                                                     | No                                               |
| SNCA           | 11    | 7              | 4               | <i>SNCA</i>                                 | SN expression; Differential expression; WGCNA module              | Yes                                              |
| SPPL2B         | 80    | 65             | 29              | <i>UQCRI1</i>                               | SN expression; Differential expression; WGCNA module              | Yes                                              |
| SREBF1-RAI1    | 67    | 26             | 12              | <i>COPS3; NT5M</i>                          | SN expression; Differential expression; pLI                       | No, neither                                      |



|                         |    |    |    |                                    |                                                           |                |
|-------------------------|----|----|----|------------------------------------|-----------------------------------------------------------|----------------|
| <b>STK39</b>            | 17 | 10 | 4  | <i>STK39; B3GALT1</i>              | SN expression; Differential expression; pLI               | Yes            |
| <b>TMEM175-GAK-DGKQ</b> | 40 | 25 | 10 | <i>MAEA; CPLX1; ATP5I; TMEM175</i> | SN expression; Differential expression; WGCNA module; pLI | Yes, all three |
| <b>TMEM229B</b>         | 24 | 15 | 8  | <i>VTG1B; ATP6V1D</i>              | SN expression; Differential expression; pLI               | Yes            |
| <b>USP25</b>            | 27 | 6  | 2  | <i>HSPA13</i>                      | SN expression                                             | Yes            |
| <b>VPS13C</b>           | 11 | 5  | 2  | <i>TLN2; RORA</i>                  | SN expression; pLI                                        | No             |

1148 Scoring was carried out as described in the Results and Methods. Candidate genes are presented for each of 32 PD  
1149 GWAS loci (identified by Nalls, *et al*<sup>11</sup>). Additional information for each PD GWAS locus is presented including the  
1150 number of unique genes scored, the number of genes with a mouse homolog, the number of genes expressed in mouse  
1151 SN DA neurons, which data prioritized the top genes, and whether the closest gene to the lead SNP is expressed.  
1152 Detailed scoring for each gene can be found in Supplementary Table 8.

1153

1154

1155

1156

1157

1158

1159
